1 **The mitochondrial HSP90 paralog TRAP1 forms an OXPHOS-**  
2 **regulated tetramer and is involved in maintaining mitochondrial**  
3 **metabolic homeostasis**

4  
5 Abhinav Joshi<sup>1</sup>, Joyce Dai<sup>2</sup>, Jungsoon Lee<sup>3</sup>, Nastaran Mohammadi Ghahhari<sup>1</sup>,  
6 Gregory Segala<sup>1</sup>, Kristin Beebe<sup>2</sup>, Francis T.F. Tsai<sup>3,4,5</sup>, Len Neckers<sup>2,6</sup>  
7 and Didier Picard<sup>1,6\*</sup>

8  
9 <sup>1</sup>Département de Biologie Cellulaire  
10 Université de Genève  
11 Sciences III  
12 30, quai Ernest-Ansermet  
13 CH - 1211 Genève 4, Switzerland

14  
15 <sup>2</sup>Urologic Oncology Branch  
16 Center for Cancer Research, NCI  
17 Bethesda, MD 20892, USA

18  
19 <sup>3</sup>Department of Biochemistry and Molecular Biology  
20 Baylor College of Medicine  
21 Houston, TX 77030, USA

22  
23 <sup>4</sup>Department of Molecular and Cellular Biology  
24 Baylor College of Medicine  
25 Houston, Texas 77030, USA

26  
27 <sup>5</sup>Department of Molecular Virology and Microbiology  
28 Baylor College of Medicine  
29 Houston, Texas 77030, USA

30  
31  
32 <sup>6</sup> these senior authors contributed equally

33  
34 \* Corresponding author  
35 Phone: +41 22 379 6813  
36 Email: didier.picard@unige.ch  
37

## 38 **Abstract**

39

40 **Background:** The molecular chaperone TRAP1, the mitochondrial isoform of  
41 cytosolic HSP90, remains poorly understood with respect to its pivotal role in the  
42 regulation of mitochondrial metabolism. Most studies have found it to be an inhibitor  
43 of mitochondrial oxidative phosphorylation (OXPHOS) and an inducer of the  
44 Warburg phenotype of cancer cells. However, others have reported the opposite and  
45 there is no consensus on the relevant TRAP1 interactors. This calls for a more  
46 comprehensive analysis of the TRAP1 interactome and of how TRAP1 and  
47 mitochondrial metabolism mutually affect each other.

48

49 **Results:** We show that the disruption of the gene for TRAP1 in a panel of cell lines  
50 dysregulates OXPHOS by a metabolic rewiring that induces the anaplerotic  
51 utilization of glutamine metabolism to replenish TCA cycle intermediates. Restoration  
52 of wild-type levels of OXPHOS requires full-length TRAP1. Whereas the TRAP1  
53 ATPase activity is dispensable for this function, it modulates the interactions of  
54 TRAP1 with various mitochondrial proteins. Quantitatively by far the major  
55 interactors of TRAP1 are the mitochondrial chaperones mtHSP70 and HSP60.  
56 However, we find that the most stable stoichiometric TRAP1 complex is a TRAP1  
57 tetramer, whose levels change in response to both a decline or an increase in  
58 OXPHOS.

59

60 **Conclusions:** Our work provides a roadmap for further investigations of how TRAP1  
61 and its interactors such as the ATP synthase regulate cellular energy metabolism.  
62 Our results highlight that TRAP1 function in metabolism and cancer cannot be

63 understood without a focus on TRAP1 tetramers as potentially the most relevant  
64 functional entity.

65

66

67 **Keywords**

68 HSP90, TRAP1, oxidative phosphorylation, glutamine, mitochondria, molecular

69 chaperone, ATP synthase, proteomics.

## 70 **Background**

71 Cells adapt their core metabolism in order to sustain survival in an environment  
72 where availability of oxygen and nutrients can be limiting [1, 2]. In the past few years,  
73 TRAP1, the mitochondrial isoform of the heat-shock protein 90 (HSP90), has been  
74 recognized as an important modulator of mitochondrial bioenergetics of normal and  
75 cancer cells [3-6]. TRAP1 is directed to the mitochondrial matrix [3, 7, 8] by an N-  
76 terminal mitochondrial targeting sequence that is cleaved off upon import [9]. The  
77 processed TRAP1 protein is composed of an N-terminal ATPase domain, a middle  
78 domain, and a C-terminal dimerization domain; this domain structure is similar to that  
79 of cytosolic HSP90 [10], which is the core component of a molecular chaperone  
80 machine that is crucial for assisting a large number of “clients” implicated in a wide  
81 array of biological processes [11-13]. While cytosolic HSP90 has been extensively  
82 studied in the past few decades [13], less is known about the biochemical activities  
83 of TRAP1 and how they relate to its role in metabolic regulation (see below). Its  
84 crystal structure was recently determined, which has helped to understand its  
85 ATPase driven conformational cycle [10, 14-16]. However, in contrast to HSP90,  
86 whose ATPase cycle and biological activities are modulated by a large cohort of co-  
87 chaperones [13, 17], no co-chaperones have been identified for TRAP1. This may be  
88 related to its kinship with bacterial Hsp90, which also functions in the absence of co-  
89 chaperones.

90

91 TRAP1 expression was found in several studies to be inversely correlated to  
92 oxidative phosphorylation (OXPHOS) and OXPHOS-coupled ATP synthesis in  
93 different cell types [3, 4]. These data suggested that TRAP1 is a negative regulator  
94 of mitochondrial OXPHOS, but the underlying molecular mechanisms have remained

95 controversial. While TRAP1 had been shown to inhibit complex II [4] and IV [3] of the  
96 electron transport chain by some, it has also been shown to activate complex II [18]  
97 and to support OXPHOS [19] by others. Thus, although TRAP1 has been proposed  
98 to play a key role in the induction of the Warburg phenotype of cancer cells,  
99 conflicting studies [18, 19] clearly call for additional research to understand how  
100 TRAP1 regulates mitochondrial metabolism. A better understanding requires a  
101 comprehensive analysis of its interactions with other mitochondrial proteins, in  
102 general, and with OXPHOS-associated proteins in particular. Moreover, only a more  
103 detailed examination of how TRAP1 and cellular metabolism affect each other will  
104 provide sufficient biological insights to evaluate TRAP1 as a potential drug target for  
105 the treatment of cancer and other diseases with a metabolic imbalance.

106

107

## 108 **Results**

109

### 110 **Loss of TRAP1 increases OXPHOS due to an anaplerotic increase in glutamine** 111 **uptake and metabolism**

112 The gene *TRAP1* was disrupted in HEK293T, HCT116, A549, and UMUC3 cells  
113 using the CRISPR/Cas9 technology and the workflow presented in Additional file 1:  
114 Figure S1a. To confirm that the *TRAP1* knock-out (KO) resulted in an increase in  
115 mitochondrial respiration, the cellular oxygen consumption rate (OCR), which is a  
116 measure of mitochondrial respiration, was measured in real time in WT and KO  
117 HEK293T and HCT116 cells (Fig. 1a, Additional file 1: Figure S1b). Similar to what  
118 we had found with mouse adult fibroblasts (MAFs) [3], the KO increases  
119 mitochondrial OCR (Fig. 1b) and OXPHOS-linked ATP production (Fig. 1c) in

120 HEK293T cells. An analysis of the energy profile of these cells further showed that  
121 although the glycolytic potential of KO cells remained similar to the WT cells  
122 (baseline and stressed), the KO made these cells more “aerobic” and dependent  
123 upon OXPHOS under normoxic conditions when compared to the WT cells (Fig. 1d).  
124 Note that while both HEK293T and HCT116 KO cell lines exhibited increased OCR  
125 (Fig. 1a, Additional file 1: Figure S1b), the impact of the KO on OCR is not  
126 comparable across the two cell lines, probably because of their different metabolic  
127 preferences [20]. The increase in mitochondrial respiration could be suppressed in  
128 both HEK293T and HCT116 KO cells by re-introducing TRAP1, but not by  
129 overexpressing EGFP directed to the mitochondrial matrix with a TRAP1  
130 mitochondrial targeting signal (MTS) (Fig. 1e, f). The mitochondrial EGFP construct  
131 (mitoEGFP) primarily served as a control to verify that overexpression of an  
132 unrelated protein in mitochondria did not affect OXPHOS function. Also note that  
133 there is always a slight, but statistically insignificant dip in mitochondrial respiration  
134 due to transient transfection toxicity (Fig. 1e, f).

135  
136 We next wanted to identify the differential use of carbon sources underlying this  
137 respiratory dysregulation. In central carbon metabolism, mitochondrial respiration is  
138 primarily driven by the three major carbon sources glucose (Glc), pyruvate (Pyr) and  
139 glutamine (Gln). The OCRs of WT and KO cells incubated separately with each of  
140 the three carbon sources were determined (Fig. 1g-i).

141  
142 When grown only on glucose as the primary carbon source, an uptake assay with  
143 the fluorescent tracer 2-NBDG showed that HEK293T KO cells have a lower Glc  
144 uptake than WT cells (Fig. 1j). As a direct consequence, they display a reduced OCR

145 (Fig. 1g) and rate of extracellular acidification (ECAR), caused by lactate secretion, a  
146 measure of the glycolytic flux (Fig. 1k).

147

148 To maintain a minimal glycolytic rate and to promote pyruvate oxidation in  
149 mitochondria, WT and KO cells were grown overnight in a medium containing  
150 galactose and pyruvate (Gal + Pyr) as the only carbon sources [21]. Under these  
151 conditions, the ECAR profile tends to mimic the OCR profile (compare Fig. 1l with  
152 Additional file 1: Figure S1c and Additional file 1: Figure S1d with Additional file 1:  
153 Figure S1e). Real-time respiration monitoring showed that the basal OCR in both  
154 HEK293T (Fig. 1l, h) and HCT116 KO cells (Additional file 1: Figure S1d) is  
155 decreased, indicating an overall decrease in assimilation of pyruvate into the  
156 tricarboxylic acid (TCA) cycle. A separate OCR analysis with only pyruvate as the  
157 carbon source gave similar results demonstrating that this outcome was not due to a  
158 galactose-induced artefact (Additional file 1: Figure S1f). In contrast, OCR analysis  
159 with only Gln as the primary carbon source (Fig. 1m, i and Additional file 1: Figure  
160 S1g) indicated a metabolic preference of KO cells for Gln. This may compensate for  
161 the reduced Glc or Pyr metabolism and indicate an anaplerotic shift, that is the  
162 replenishment of TCA cycle intermediates diverted to various biosynthetic pathways  
163 [22], in this case by the increased utilization of Gln. Similarly to Pyr alone, the ECAR  
164 profile with only Gln mimicked the OCR profiles of both HEK293T and HCT116 cells,  
165 which indicates that Gln is also primarily metabolized in mitochondria in both cell  
166 types (Additional file 1: Figure S1h, i).

167

168 To confirm the increased Gln uptake and utilization by KO cells, indicated by the  
169 OCR experiments, a quantitative flux tracing experiment was performed. For this,

170 isotopically labelled Gln ( $^{13}\text{C}$ -Gln) was added in addition to unlabelled Glc and Pyr as  
171 carbon sources (Additional file 2: Figure S2a-c and Additional file 3: Table S1 for  
172 absolute quantitation of metabolites; for  $^{13}\text{C}$  tracing in metabolites, see the NEI area  
173 tab in Additional file 4: Table S2). Quantitation of metabolites with increased  $^{13}\text{C}$   
174 abundance in KO cells are shown in Fig. 2. Both HEK293T and A549 KO cells  
175 exhibited a significant increase in total Gln and glutamate concentrations (Fig. 2a),  
176 further confirming that KO cells prefer Gln even in the presence of the other two  
177 major carbon sources (Glc and Pyr). This is also associated with an increase in the  
178 levels of traced TCA cycle intermediates (Fig. 2b) indicating that KO cell metabolism  
179 is indeed anaplerotic: the increased Gln uptake and utilization allows the  
180 replenishment of TCA cycle metabolites. We further extended this comparison to 42  
181 different quantitated metabolites (Additional file 2: Figure S2 in conjunction with NEI  
182 area tab in Additional file 4: Table S2) and also observed a notable increase in  $^{13}\text{C}$ -  
183 traced reduced glutathione (GSH) in both HEK293T and A549 KO cells (Fig. 2c).  
184 This may indicate an adjustment to cope with increased reactive oxygen species  
185 (ROS), which are often associated with increased OXPHOS [3, 23].

186

### 187 **Full-length TRAP1 but not its ATPase activity is essential to regulate OXPHOS**

188 We next investigated which parts and functions of TRAP1 are necessary to rescue  
189 the metabolic phenotype of KO cells. We designed a custom construct to express  
190 TRAP1 variants with a C-terminal HA tag and an N-terminal TRAP1-MTS to ensure  
191 that proteins are directed into the mitochondrial matrix (Additional file 5: Figure S3a).  
192 A mitochondrially targeted EGFP construct (mito-EGFP) was used as a control  
193 (Additional file 5: Figure S3b). As mentioned previously, this construct was used to  
194 test whether overexpression of an unrelated protein in mitochondria might non-



195 specifically disrupt OXPHOS function (Fig. 1h,i and 3a-d). All TRAP1 truncation  
196 mutants as well as the full-length protein were expressed with some exhibiting bands  
197 corresponding to precursor proteins with uncleaved MTS and to shorter ones due to  
198 N-terminal cleavage (Additional file 5: Figure S3c). The TRAP1 truncation mutants  
199 were then overexpressed in the HEK293T KO cells to determine OCR profiles in the  
200 presence of all three carbon sources (Fig. 3 a, c). Once again, the OCR data with the  
201 mitoEGFP controls confirm a slight reduction in mitochondrial respiration due to  
202 transient transfection toxicity (Figs. 1h, i, and 3a, c). However, the slightly lower OCR  
203 of cells transfected with the control plasmid expressing mitoEGFP was still  
204 significantly higher when compared to the OCR of cells transfected with the WT  
205 TRAP1 expression plasmid (Fig. 3 b, d). None of the TRAP1 truncation mutants  
206 were able to suppress the KO OXPHOS phenotype to WT levels (Fig. 3 b, d). This  
207 indicates that a full-length TRAP1 protein is essential for normal OXPHOS  
208 regulation.

209  
210 Since TRAP1 is a paralog of HSP90, a molecular chaperone that is well known to be  
211 dependent on its ATPase cycle [24, 25], we speculated that the ATPase activity of  
212 TRAP1 might be required for OXPHOS regulation. To test this, we generated a panel  
213 of point and truncation mutants that affect this enzymatic activity. Note that our  
214 numbering includes the 59 amino acids of the MTS. The following ATPase activity  
215 mutants were tested: the double point mutant E115A/R402A with a 10-fold reduced  
216 ATPase activity relative to WT (Additional file 5: Figure S3d), the 30-fold hyperactive  
217 ATPase mutant  $\Delta$ Strap, and the moderately activated (2.5-fold) ATPase single point  
218 mutant D158N [14]. To our surprise, all ATPase mutants are able to suppress the  
219 OXPHOS phenotype of the KO cells, reducing the OCR to WT levels (Fig. 3e-i).

220 Similar results were obtained when the OCR analysis was done with cells in medium  
221 with only Gln as the carbon source (Additional file 5: Figure S3e). We further  
222 confirmed the ATPase independence of the complementation by performing a  
223 separate real-time OCR analysis with murine cells comparing KO MAFs stably  
224 expressing either WT or the single point mutant E115A of human TRAP1 (Fig. 3j).  
225 Note that the mutant E115A was designed by analogy to the yeast HSP90 E33A  
226 mutant, which has been reported to be able to bind to ATP, but to be defective for  
227 ATP hydrolysis [24, 26]; E115A, similarly to the single mutant mentioned above,  
228 binds ATP, but is defective for ATP hydrolysis [15]. Thus, the ability to hydrolyze  
229 ATP, at least as well as WT TRAP1, is not essential for the regulation of OXPHOS  
230 by TRAP1.

231

### 232 **TRAP1 primarily interacts with other mitochondrial chaperones and OXPHOS-** 233 **associated proteins**

234 While HSP90 has an exhaustive list of clients and co-chaperones [13, 27-30], the  
235 interactome of its mitochondrial paralog remains poorly characterized [6]. After  
236 ascertaining that a full-length TRAP1 is essential for OXPHOS regulation, we  
237 wondered which proteins interact with TRAP1 and whether these might explain its  
238 role in OXPHOS regulation.

239

240 We carried out an immunoprecipitation mass spectrometry (IP-MS) experiment with  
241 WT TRAP1 and the ATPase mutants E115A/R402A and  $\Delta$ Strap overexpressed in  
242 HEK293T cells (Additional file 6: Figure S4a; Additional file 7: Table S3). To refine  
243 this list of identified proteins, the protein interactors were first filtered for validated  
244 mitochondrial proteins and then by limiting the dataset to proteins with four or more

245 identified unique peptides. This yielded a list of 82 proteins common to WT TRAP1  
246 and the two ATPase mutants; we took these to represent the most probable TRAP1  
247 interactors (Additional file 8: Table S4). This list primarily contains other  
248 mitochondrial chaperones (for example GRP75, CH60, and PHB, which are also  
249 known as mtHSP70/mortalin, HSP60, and prohibitin, respectively), OXPHOS  
250 complex subunits (ATP synthase, complex I, IV), channel/carrier proteins (TOM/TIM  
251 complexes, VDACs) and other mitochondrial enzymes (YMEL1, FAS, ECHA). It is  
252 noteworthy that, while we could detect the previously reported TRAP1 interactors  
253 SDHA [4, 31], COX4, ATPB, and NDUA9 [19], we did not see others including  
254 cyclophilin D [32], PINK1 [33], c-Src [3], HTRA2 [34], and SIRT3 [19] (Additional file  
255 7: Table S3). This may be due to differences in cell lines, relative affinities,  
256 interactor-directed IPs, or to other experimental details. More unexpectedly, we did  
257 not find any enzymes directly involved in Gln metabolism, such as glutaminase,  
258 glutamine synthase and glutamate dehydrogenase. Note that as a consequence of a  
259 decline in Glc and Pyr metabolism, the fluctuating ADP to ATP ratios in KO cells may  
260 act as a potent activator of glutaminase to fuel the TCA cycle [35, 36]. ADP has been  
261 reported to be the strongest nucleotide activator of glutaminase [35], but ATP, both  
262 at low and high concentrations, also stimulates glutaminase activity [36].

263  
264 For further analysis, we used the total peptide spectral matches (PSM, a metric  
265 based on the total number of identified peptides for a given protein), to standardize  
266 and to compare the data from IPs with WT and mutant TRAP1. Once standardized to  
267 WT, interactors of individual TRAP1 mutants could be compared amongst  
268 themselves, and as a ratio to the respective TRAP1 versions (set to 100). It is  
269 striking that TRAP1 interacting proteins segregate into two major groups based on

270 how much protein was pulled down with WT or mutant TRAP1 (Fig. 4a, Additional  
271 file 8: Table S4). Quantitatively, the mitochondrial chaperones GRP75 (mtHSP70),  
272 CH60 (HSP60) and PHB2 are the main TRAP1 interactors while all other interactors  
273 segregate into the second less abundant group (Fig. 4a, inset).

274

275 Consistent with what has been observed for yeast HSP90 by a two-hybrid screen  
276 [37], most of the TRAP1 interactors, except the major mitochondrial chaperones  
277 mtHSP70 (GRP75) and HSP60 (CH60), have a preference for binding the TRAP1  
278 mutant E115A/R402A, which has a 10-fold reduced ATPase activity and might  
279 therefore accumulate in the ATP-bound conformation (Fig. 4b, Additional file 8: Table  
280 S4). This preference for the ATP-bound state could also be seen when low and  
281 hyperactive ATPase mutants were individually compared to WT TRAP1 (Additional  
282 file 6: Figure S4b, c).

283

284 Taken together, these results show that while the ATPase activity of TRAP1 can vary  
285 greatly without affecting OXPHOS regulation and interaction with other mitochondrial  
286 chaperones, TRAP1 ATPase activity is inversely correlated with binding to other  
287 TRAP1 interactors.

288

## 289 **Loss of TRAP1 has a minor impact on mitochondrial and total cellular** 290 **proteomes**

291 We speculated that the absence of TRAP1 might destabilize some of its direct or  
292 indirect interactors or lead to a compensatory upregulation of other proteins. We  
293 used two separate approaches to identify such proteome changes. First, we  
294 performed a quantitative SILAC MS analysis comparing WT to KO UMUC3 cells. 200

295 mitochondrial proteins were detected (Additional file 9: Table S5). Among this group  
296 of interactors, we found little variation comparing KO to WT cells when the minimum  
297 significant fold change is set to 2 ( $p < 0.05$ ) (Fig. 4c). Even with a cutoff of 1.5-fold,  
298 only a few alterations in the mitochondrial proteome could be seen (Fig. 4c,  
299 Additional file 9: Table S5). With the notable exception of PHB2 (when a 1.5-fold  
300 change is set as threshold), most of the mitochondrial proteins including those  
301 predicted to interact with TRAP1 (especially the subunits of the ATP-synthase  
302 complex highlighted by the analysis of Fig. 4b), show no significant up- or  
303 downregulation in UMUC3 KO cells (Additional file 9: Table S5). Thus, the TRAP1  
304 KO does not have a significant impact on the stability of the mitochondrial proteome.  
305

306 Second, we did a label free quantitation (LFQ) MS analysis of the total cellular  
307 proteome with WT and KO HEK293T and HCT116 cells cultured with the three  
308 different cocktails of carbon sources (Glc + Pyr + Gln, Gal + Pyr only, Gln only;  
309 Additional file 10: Table S6). We reduced the initial list of 4578 proteins to 2660  
310 proteins by using as criterion the identification of at least seven unique peptides per  
311 protein (Additional file 11: Table S7). The comparison of the  $LFQ^{KO}/LFQ^{WT}$  ratios for  
312 these proteins from cells cultured in medium with all three carbon sources did not  
313 reveal any significant changes (Additional file 6: Figure S4d, e). Although a few  
314 proteins were observed outside the 2-fold limit, they were not consistent across  
315 HEK293T and HCT116 cells to warrant a correlation with the loss of TRAP1. The  
316 LFQ ratio profiles turned out to be similar for media with other combinations of  
317 carbon sources (Additional file 11: Table S7).  
318

319 *In toto*, all three MS experiments indicated that while TRAP1 interacts with multiple  
320 mitochondrial proteins, its loss does not have much of an impact on the  
321 mitochondrial or cellular proteomes.

322

### 323 **TRAP1 forms an oligomeric complex**

324 Our IP-MS experiment suggested that TRAP1 associates with a number of proteins  
325 of the mitochondrial matrix in a manner independent of its own ATPase activity. To  
326 explore this further, we decided to separate mitochondrial extracts made with a non-  
327 ionic detergent from HEK293T cells on clear native polyacrylamide gels (native  
328 PAGE) capable of resolving molecular complexes between 1 MDa and and 240 kDa  
329 (Fig. 5). We chose clear native PAGE rather than blue native gels because the  
330 milder conditions can better preserve the structural and functional integrity of protein  
331 complexes; overall, despite the slightly poorer resolution compared to blue native  
332 gels, clear native gels have been demonstrated to yield largely comparable results,  
333 notably for mitochondrial complexes [38]. We expected the migration of complexes  
334 with a protein such as TRAP1 with a pI of 6.40 in a separating gel at pH 8.8 to be  
335 reasonably well correlated with molecular weight and size. When blotted for  
336 endogenous TRAP1, a single molecular complex of ~300 kDa could be seen, which  
337 is absent from KO cells (Fig. 5). However, the molecular weight of the detected  
338 complex was not exactly what was expected if a TRAP1 dimer was in a complex with  
339 mtHSP70, HSP60 or even both proteins. Moreover, looking at overexpressed WT or  
340 ATPase mutant TRAP1 side by side, we found that the E115A/R402A mutant forms  
341 a complex of the same size as WT TRAP1 whereas the hyperactive ATPase mutant  
342 ( $\Delta$ Strap) seems to form a slightly larger or conformationally different, more slowly  
343 migrating complex (Fig. 5).

344

345 To determine what the 300 kDa TRAP1 complex contains, we expressed a TRAP1-  
346 GST fusion protein and GST alone as a negative control, and applied the workflow  
347 described in Additional file 12: Figure S5A for a GST-pulldown MS analysis. Upon  
348 setting the cutoff for an interactor at a minimum of eleven unique peptides, no  
349 mitochondrial chaperone could be detected in the excised gel piece. Apart from  
350 TRAP1, only proteins that were also co-purified with GST alone could be identified  
351 (Additional file 12: Figure S5b, Additional file 13: Table S8). Hence, the high  
352 molecular weight TRAP1 complex (~400 kDa in the case of TRAP1-GST) only  
353 contains TRAP1-GST. The TRAP1 interactors mtHSP70 and HSP60 may not be  
354 sufficiently stably bound to remain associated during native gel electrophoresis. The  
355 sizes of the TRAP1 and TRAP1-GST complexes are consistent with TRAP1 forming  
356 a stable tetramer or a dimer of dimers.

357

### 358 **The TRAP1 complex is induced in response to OXPHOS perturbations**

359 Based on the hypothesis that an oligomerized TRAP1 complex might be the  
360 functional entity of TRAP1, we checked its levels when OXPHOS is inhibited with a  
361 prolonged exposure of HEK293T cells to hypoxia in various media (Fig. 6a).  
362 Although the baseline levels of the TRAP1 complex vary in cells adapted to different  
363 carbon sources in normoxia (left part of Fig. 6a), we saw a consistent increase in the  
364 levels of the TRAP1 complex when cells were placed in hypoxia. It is notable that the  
365 maximum increase in the levels of the TRAP1 complex was observed with cells  
366 grown in Gal + Pyr medium when they were exposed to hypoxia (Fig. 6a). Cells with  
367 this carbon source combination exclusively rely on OXPHOS for respiration  
368 (Additional file 1: Figure S1, compare panels d and e). Considering that the ATP

369 synthase is one of the major OXPHOS complexes that is inhibited by prolonged  
370 hypoxia [39] and that we had found ATP-synthase components to be amongst the  
371 main TRAP1 interactors (see Fig. 4b), we asked whether inhibition of the ATP-  
372 synthase complex would affect TRAP1 oligomerization (Fig. 6b). To this end, we  
373 compared the levels of the TRAP1 complex from HEK293T cells exposed to hypoxia  
374 or to the ATP-synthase inhibitor oligomycin under normoxic conditions. Under  
375 hypoxic conditions, the induction of the TRAP1 complex is slow and only seems to  
376 initiate around 6 hrs. (Fig. 6b). The slow time course may reflect the slow depletion  
377 of oxygen from the medium and cells rather than a characteristic of mitochondria or  
378 the TRAP1 complex. There is also an overall increase in the levels of TRAP1  
379 protomers in cells exposed to hypoxia (Fig. 6b, middle panel with SDS-PAGE), but  
380 this induction does not appear to be HIF1 $\alpha$ -mediated (Additional file 14: Figure S6a).  
381 In contrast, oligomycin induces a more rapid accumulation of the TRAP1 complex  
382 above basal level without a noticeable concomitant increase in total TRAP1 protein  
383 levels (Fig. 6b).

384  
385 Our results showing the existence of a previously unreported TRAP1 oligomeric  
386 complex were quite surprising considering that structural [10, 15] and crosslinking  
387 [40] studies had only reported TRAP1 to exist as a dimer. To determine whether the  
388 dimer and tetramer co-exist at steady state without crosslinking, we compared the  
389 endogenous TRAP1 to our panel of full-length TRAP1 proteins with different tags  
390 using native gel analysis capable of resolving complexes from 480 kDa to ~120 kDa  
391 (Fig. 6c). Although all protomers were well expressed (Fig. 6c, lower panel with SDS-  
392 gels), we did not observe any TRAP1 dimer at steady state, neither with endogenous  
393 TRAP1 nor upon further induction of the TRAP1 complex with oligomycin (Fig. 6c).



394 This suggests that a TRAP1 tetramer and not a dimer is the functional unit of TRAP1  
395 in mitochondria.

396

397 All of the experiments presented so far regarding the TRAP1 complex were  
398 performed solely with HEK293T cells. We therefore confirmed the existence and  
399 inducibility of the TRAP1 complex in four other cell lines: breast cancer-derived cell  
400 lines MCF-7 and MDA-MB-134, the prostate cancer cell line PC3, and the colon  
401 cancer cell line HCT116. A high molecular weight TRAP1 complex, which is rapidly  
402 induced further in response to ATP synthase inhibition, was readily detected in each  
403 cell line (Additional file 14: Figure S6b).

404

405 Next, we assessed the impact of inhibitors of the electron transport chain (ETC) on  
406 the TRAP1 complex in MCF-7 and HEK293T cells (Fig. 7a and Additional file 15:  
407 Figure S7). Both cell lines showed an accumulation of the TRAP1 complex when the  
408 ATP synthase was compromised (Fig. 7a and Additional file 15: Figure S7). In  
409 contrast to the inhibition of the ATP-synthase complex (complex V of the ETC),  
410 inhibition of complexes I or III or both reduced the TRAP1 complex levels in both cell  
411 lines (Fig. 7a and Additional file 15: Figure S7). Therefore, we tested whether  
412 inhibition of ATP synthase could override the effects of complex I and III inactivation  
413 (Fig. 7b). This was examined at the 3 and 6 hr time points with a combination of  
414 rotenone + antimycin and oligomycin + rotenone + antimycin in parallel. Indeed,  
415 inhibition of ATP synthase was able to override the suppressive effect of the  
416 combined inhibition of complexes I and III on the TRAP1 complex in HEK293T cells,  
417 as can be most clearly seen at the 6 hr time point (Fig. 7b).

418

419 Having found that the levels of the TRAP1 complex change upon inhibiting  
420 OXPHOS, we wondered what would happen if OXPHOS were upregulated. This  
421 question is not trivial to address experimentally as it appears that most cells in  
422 culture operate OXPHOS at or close to maximal capacity. We decided to culture  
423 HEK293T cells on glucose as the only carbon source and then to force them to divert  
424 pyruvate to OXPHOS by blocking its conversion to lactate with a lactate  
425 dehydrogenase inhibitor (LDHi) (Fig. 7c). This treatment increased the basal OCR of  
426 HEK293T cells by more than 2-fold compared to the low basal value of cells grown  
427 with glucose as the only carbon source (Fig. 7d). When the cells were treated for 2, 4  
428 or 6 hrs with the LDHi under this condition, we observed a steady increase in the  
429 induction of the TRAP1 complex (Fig. 7e). Thus, the TRAP1 complex can be induced  
430 both in response to inhibition of OXPHOS at the level of ATP synthase and to an  
431 increase of OXPHOS.

432

## 433 **Discussion**

434 The role of TRAP1 in the regulation of mitochondrial metabolism had remained  
435 controversial. Here we provide new insights that should help clarify the impact of  
436 TRAP1 on cellular energy metabolism and, conversely, on how changes in cellular  
437 metabolism affect TRAP1 itself. In most cell lines grown in rich medium, the primary  
438 phenotype of a loss of TRAP1 function is an increase in mitochondrial respiration  
439 and ATP production [6]. Based on a limited metabolomics analysis we had  
440 previously speculated that the increase in OXPHOS in TRAP1-deficient cells is  
441 anaplerotic [3]. By using CRISPR/Cas9-generated *TRAP1* KO cell lines, OCR  
442 experiments with restricted carbon sources, and metabolomics, we have discovered  
443 that the increase in OXPHOS in TRAP1 KO cells is a consequence of stimulated Gln

444 metabolism. The anaplerotic metabolism of TRAP1 KO cells itself might be a  
445 compensatory response to a decline in glucose uptake and pyruvate assimilation into  
446 the TCA cycle under normoxic conditions. Why cellular glucose uptake and  
447 mitochondrial pyruvate utilization are reduced in the absence of TRAP1 remains to  
448 be elucidated. Interestingly, the increase in Gln metabolism of TRAP1 KO cells is  
449 also channeled into the synthesis of GSH, possibly to buffer the increased ROS  
450 produced as a consequence of upregulated OXPHOS [3, 31, 41].

451

452 Surprisingly, we could not find any evidence of an interaction between TRAP1 and  
453 the enzymes directly involved in Gln metabolism in our TRAP1 IP-MS data, even  
454 though we had observed that TRAP1 KO cells grown in Gln only medium are more  
455 sensitive to the glutaminase inhibitor CB-839 than WT cells (data not shown).

456 Glutaminase activity has previously been shown to be stimulated by ATP [36], and  
457 even more strongly by ADP [35]. Therefore, we speculate that the increase in the  
458 ADP/ATP ratio associated with the decline in glucose and pyruvate metabolism in  
459 TRAP1 KO cells provides a strong stimulus for activation of mitochondrial  
460 glutaminase resulting in a re-equilibrated ADP/ATP ratio. Unfortunately, there is at  
461 present no experimental means to measure glutaminase activity in real time as a  
462 function of ADP or ATP levels in live cells.

463

464 Our efforts to understand how TRAP1 functions as a negative regulator of  
465 mitochondrial OXPHOS in normoxia show that the restoration of properly regulated,  
466 wild-type levels of OXPHOS requires full-length TRAP1. While this is not surprising,  
467 it was unexpected that the ATPase activity of TRAP1 does not correlate with its  
468 ability to restore OXPHOS to WT levels. This finding strongly suggests that the

469 ATPase activity of TRAP1 is not essential for OXPHOS regulation. This is  
470 reminiscent of relatively recent findings with cytosolic HSP90 indicating that the rate  
471 of ATP hydrolysis does not correlate with the ability of this molecular chaperone to  
472 support yeast viability [42], while ATP binding is absolutely essential [24, 26, 42].  
473 Similarly, some activities of the bacterial form of HSP90, HtpG, do not depend on its  
474 ATPase activity [43]. In the case of TRAP1, it was not possible to test whether ATP  
475 binding *per se*, even without hydrolysis, is essential for TRAP1 to regulate OXPHOS.  
476 As of today, there is no TRAP1 point mutant that is functionally equivalent to the  
477 yeast HSP90 mutant D79N, which abolishes ATP binding [24, 26]. Studies on  
478 substitutions of D158, the corresponding amino acid of TRAP1, have yielded  
479 conflicting results [14, 44], although the observation that the ATPase activity of  
480 D158N is several fold greater than that of WT [14] implicitly proves that this particular  
481 mutant can still bind ATP.

482

483 Whereas the rate of TRAP1 ATP hydrolysis does not influence its role in OXPHOS  
484 regulation, the TRAP1 IP-MS data described in this study show that the ATP  
485 hydrolysis rate does affect TRAP1 interactions with other non-chaperone proteins.  
486 While the binding of major TRAP1 interactors such as the molecular chaperones  
487 mtHSP70 and HSP60 remains unaffected by the ATPase activity of TRAP1, the  
488 binding of most non-chaperone interactors, similarly to what has been reported for  
489 cytosolic HSP90 interactors [42], is inversely correlated with TRAP1 ATPase activity.

490

491 Cytosolic HSP90, with its large clientele of proteins, is a major network hub in the  
492 cellular proteome; as a result, pharmacological inhibition of HSP90 greatly  
493 destabilizes the cellular proteome [45-50]. This is in stark contrast to what we found

494 for TRAP1, whose loss does not cause a significant imbalance in either the  
495 mitochondrial or cellular proteomes. Even the highest confidence TRAP1 interactors  
496 such as ATP synthase remain unaffected. Probably the most notable change in  
497 TRAP1 KO cells is the increase in mitochondrial SOD2 protein levels. This may be a  
498 secondary response to the increase in GSH levels to reduce the oxidative stress that  
499 is a direct consequence of increased OXPHOS in TRAP1 KO cells.

500

501 Since the major goal of this study was to understand how TRAP1 regulates  
502 OXPHOS, we chose to focus on TRAP1 interactors that did not differentially  
503 segregate between the ATPase mutants in our IP-MS analysis. This category of  
504 interactors includes mtHSP70 and HSP60 as the main interactors of TRAP1. Since  
505 cytosolic and bacterial HSP90 work as a chaperone machine in the cytosol with the  
506 HSP70/HSP40 system [51, 52], we set out to investigate and to visualize such  
507 complexes for TRAP1 by native PAGE. The TRAP1 complex that we saw had an  
508 unexpected apparent molecular weight close to 300 kDa. If TRAP1 were to associate  
509 with HSP60 alone, this complex should have been  $\geq 570$  kDa in size since TRAP1  
510 has been reported to form a dimer [10, 15, 53], and since the minimum functional  
511 unit of HSP60 is reported to be an oligomerized heptamer [54]. As a heterotetramer  
512 with mtHsp70, it could have been close to the observed size of 300 kDa [16].

513 However, the MS analysis of proteins pulled down with a TRAP1-GST fusion protein  
514 revealed that the detected TRAP1 complex is composed solely of TRAP1.

515 Considering the apparent size of the 400 kDa TRAP1-GST complex, we concluded  
516 that it must be composed of four TRAP1 protomers, organized either as a tetramer  
517 or as a dimer of dimers. Previous biochemical and structural analyses with purified  
518 recombinant TRAP1 had shown that TRAP1 exists as a homodimer [10, 40]. Despite

519 our specific efforts to detect them by native PAGE, both for endogenous and  
520 overexpressed TRAP1, we were unable to do so. Thus, TRAP1 might not  
521 functionally exist as a stable dimer in the mitochondrial matrix at steady state, but  
522 only as the proposed tetramer. Intriguingly, higher order structures for cytosolic  
523 HSP90 have been found upon exposure to elevated temperatures [55-57]. Moreover,  
524 bacterial HtpG was found to be composed of dimers of dimers in the crystal structure  
525 [58]. While it remains unclear whether these structures are physiologically relevant  
526 for either eukaryotic or bacterial HSP90, our results indicate that they may well be for  
527 TRAP1 in mitochondria, which have been demonstrated to function at a higher  
528 temperature than the cytosol [59]. Future biochemical and structural analyses of  
529 TRAP1 complexes isolated from mitochondria or formed *in vitro* could help to  
530 characterize the determinants of this higher order assembly.

531

532 In view of the evidence that a TRAP1 tetramer may be the primary “functional unit” of  
533 TRAP1, we reasoned that its levels might be influenced by fluctuating OXPHOS.  
534 Indeed, when we inhibited OXPHOS by exposure of cells to hypoxia, we observed  
535 that the levels of the TRAP1 complex increased with a corresponding increase in the  
536 total mitochondrial protomer levels as observed with native and denaturing PAGE,  
537 respectively. However, this increase in TRAP1 complex and total protomer levels  
538 cannot be attributed to HIF1 $\alpha$  as its overexpression does not induce TRAP1 mRNA  
539 expression. Hypoxia is a strong inhibitor of ATP synthase [39, 60] and thus, the  
540 induction of the TRAP1 complex can be observed both upon inhibiting ATP synthase  
541 by hypoxia and in normoxic cells with the pharmacological inhibitor oligomycin. The  
542 connection with the ATP synthase is further supported by our finding that multiple  
543 subunits comprising the ATP-synthase complex interact with TRAP1. Although the

544 induction of the TRAP1 complex was consistent with the pharmacological inhibition  
545 of ATP synthase across multiple cell lines, the variation in its protomer levels was  
546 not. While the TRAP1 complex is induced by inhibition of ATP synthase, it is reduced  
547 by inhibition of complexes I or III. Surprisingly, we found that inhibition of ATP  
548 synthase overrides the latter effect. This pharmacological epistasis experiment  
549 argues that ATP synthase is a primary TRAP1 interactor in the ETC. The opposite  
550 “perturbation” of OXPHOS, that is its stimulation by an inhibitor of lactate  
551 dehydrogenase, similarly promotes the formation of the TRAP1 tetramer. Thus, for  
552 reasons that remain to be elucidated, the “functional unit” of TRAP1 is sensitive to  
553 both an induction or a decline in OXPHOS.

554

555 *In toto*, although the precise molecular mechanism for how TRAP1 regulates  
556 OXPHOS remains to be uncovered, we know now that the overall levels of TRAP1  
557 may not be correlated or relevant to OXPHOS regulation as previously thought [6]. It  
558 is really its tetrameric form that needs to be quantitated and structurally and  
559 functionally dissected in more detail to understand how TRAP1 contributes to  
560 regulating OXPHOS and mitochondrial homeostasis.

561

562

## 563 **Materials and methods**

564

### 565 **Plasmids**

566 The pcDNA3.1 (+) MTS-HA construct to direct all proteins to the mitochondrial matrix  
567 was generated by cloning the human TRAP1 mitochondrial targeting sequence  
568 between the EcoR1 site on the pcDNA3.1 (+) vector. All pcDNA3.1 (+) TRAP1-HA

569 constructs including the truncation mutants were generated by cloning the human  
570 TRAP1 coding sequence into the pcDNA3.1 (+) MTS-HA construct. The TRAP1  
571 coding sequence (without the MTS) was cloned into the XhoI restriction site after the  
572 TRAP1-MTS but before the HA-tag. The E115A/R402A and the  $\Delta$ Strap mutants  
573 were subcloned from pPROEX HTb vectors into the XhoI site of the MTS-HA vector  
574 using the primers listed in Additional file 16: Table S9. The mitoEGFP construct was  
575 generated by cloning the EGFP coding sequence into the XhoI site on the  
576 pcDNA3.1 (+) MTS-HA vector, exactly like TRAP1. mitoEGFP and all TRAP1  
577 constructs with the pcDNA3.1 (+) MTS-HA vector have a C-terminal HA-tag. The  
578 TRAP1-FLAG and D158N-FLAG constructs were generated by cloning the TRAP1  
579 coding sequence along with the C-terminal FLAG-tag between KpnI and XhoI sites  
580 on the pcDNA3.1 (+) vector. For generating the TRAP1-GST construct, the TRAP1  
581 coding sequence as a NheI-SalI fragment was joined to a SalI-EcoRI fragment  
582 carrying the GST coding sequence by insertion into the NheI-EcoRI sites of  
583 expression plasmid pcDNA3.1(+). The bacterial expression vector for the TRAP1  
584 mutant E115A/R402A was generated from pTRAP1 [14] by site-directed  
585 mutagenesis using QuikChange (Agilent Technology). Sequences for all oligos are  
586 provided in Additional file 16: Table S9. Note that for all TRAP1 point mutant, the  
587 numbering starts with the methionine of the MTS. The pHAGE-fEF1a-IZsGreen  
588 constructs used to stably express WT and E115A TRAP1 in MAFs were generated  
589 by cloning the respective sequences between the BamHI and NotI sites in plasmid  
590 pHAGE-fEF1a-IZsGreen (Additional file 16: Table S9).

591

592 **Cell culture**



593 HEK293T, HCT116, A549, UMUC3, MCF-7 and PC3 cells were obtained from  
594 American Type Culture Collection (ATCC, see Additional file 16: Table S9). MDA-  
595 MB-134 cells were obtained from Wilbert Zwart at the Netherlands Cancer Institute,  
596 Amsterdam. Unless specified otherwise, all cells were cultured at 37°C with 5% CO<sub>2</sub>  
597 in a standard incubator with Dulbecco's Modified Eagle's Medium (DMEM) glutamax,  
598 4.5 g/l Glc and 1 mM Pyr (Thermo Scientific) supplemented with 10% fetal bovine  
599 serum (FBS), 100 u/ml penicillin and 100 µg/ml streptomycin.

600

#### 601 **TRAP1 CRISPR/Cas9 knock outs**

602 TRAP1 KO HEK293T and HCT116 cells were generated using CRISPR/Cas9  
603 genome editing [61] as illustrated in Additional file 1: Figure S1A. The gRNA was  
604 designed using the online design tool by ATUM  
605 (<https://www.atum.bio/eCommerce/cas9/input>). The sense and antisense  
606 oligonucleotides for the selected gRNA construct (see Additional file 16: Table S9)  
607 were purchased (Microsynth), annealed and then inserted into the CRISPR/Cas9  
608 vector PX459 (Addgene plasmid #48139) as previously described [61]. HEK293T  
609 and HCT116 cells were transiently transfected using polyethylenimine MAX (PEI) at  
610 a ratio of 1:3 of DNA to PEI. 48 hrs post transfection, the transfected cells were  
611 selected using 3-5 µg/ml puromycin until control non-transfected cells completely  
612 died. The remaining cells from the transfected population were allowed to grow in  
613 absence of puromycin until they formed visible foci. The cellular foci were then  
614 individually picked, subcultured and finally analyzed by immunoblotting with  
615 antibodies against TRAP1 to identify clones that were devoid of the protein. Three to  
616 five different KO clones for each cell line were frozen in liquid nitrogen. The A549  
617 and UMUC3 TRAP1 KO clones were made using the all in one vector harboring a

618 mCherry reporter (Genecopoeia, HCP200164-CG08-3; see Additional file 16: Table  
619 S9). The transfection procedure was similar to the one described for HEK293T and  
620 HCT116 cells, but the clonal isolation was performed with the mCherry reporter  
621 using FACS sorting under aseptic conditions. The sorted clones were subcultured  
622 and finally immunoblotted for TRAP1 to identify clones that were devoid of the  
623 protein.

624

### 625 **Cell culture for OCR experiments**

626 Before any single carbon source OCR experiment, the cells were grown overnight in  
627 medium with the carbon source to be tested in order to acclimatize and to stabilize  
628 them metabolically. The carbon sources were added to DMEM lacking Glc, Pyr and  
629 Gln (A14430-01; see Additional file 16: Table S9) with 10% FBS, 100 u/ml penicillin  
630 and 100 µg/ml streptomycin as follows: (i) Glc only: 4.5 g/l glucose; (ii) Gln only: 2  
631 mM glutamine; (iii) Pyr only: 1 mM sodium pyruvate; (iv) Gal and Pyr: 10 mM  
632 galactose, 1 mM sodium pyruvate.

633

### 634 **Flux assays**

635 The mitochondrial OCR and ECAR were monitored *in vivo* in real-time using a  
636 Seahorse XF analyzer (XF<sup>e</sup>24, Agilent). Depending on the experiment,  $6 \times 10^4$   
637 HEK293T or HCT116 cells were cultured overnight in custom XF24 microplates  
638 (poly-L-lysine coated) with either DMEM glutamax or DMEM (A14430-01)  
639 supplemented with the respective carbon sources. The standard assay medium used  
640 for all extracellular flux analyses and mitochondrial stress tests was unbuffered  
641 DMEM (SIGMA, D5030) without glucose, L-glutamine, sodium pyruvate, sodium  
642 bicarbonate, phenol red and FBS. Depending on the experiment, the D5030 medium

643 was supplemented with the desired carbon source as indicated above. Prior to  
644 measurements, the cells were washed with and then incubated in unbuffered media  
645 (D5030) containing the respective carbon source in the absence of CO<sub>2</sub> for 1 hr to  
646 acclimatize them to the assay medium. Following preincubation, basal OCR or  
647 ECAR were determined before recording mitochondrial stress test profiles by  
648 sequential injection of oligomycin, carbonyl cyanide-p-  
649 trifluoromethoxyphenylhydrazone (FCCP) and rotenone with antimycin in  
650 combination. For LDHi experiments, the LDHi (developed by the National Cancer  
651 Institute Experimental Therapeutics (NExT) Program) [62, 63] was injected first  
652 followed by an injection of oligomycin, rotenone and antimycin in combination to  
653 completely inhibit mitochondrial respiration.

654

655 For all assays involving transfected constructs,  $2 \times 10^5$  cells were first seeded in 6  
656 well plates and allowed to grow overnight in DMEM glutamax. They were transfected  
657 on day 2 with 3  $\mu$ g DNA using PEI for 6 hrs and further incubated overnight in DMEM  
658 glutamax. On day 3,  $6 \times 10^4$  transfected cells were seeded in polylysine-coated XF24  
659 microplates and incubated in DMEM glutamax overnight. Real-time OCR and ECAR  
660 analyses were done as described above. For Gln only OCR analysis involving  
661 transfected constructs, the  $6 \times 10^4$  cells finally seeded for analysis on day 3 were  
662 incubated overnight in DMEM (A14430-01) supplemented with Gln.

663

#### 664 **Glucose uptake and flow cytometry**

665 The Glc uptake assay was performed with WT and KO HEK293T cells. On day one,  
666  $5 \times 10^5$  cells were seeded and allowed to grow overnight in DMEM glutamax. On day  
667 2, the cells were washed and incubated in DMEM (A14430-01) without any carbon

668 sources for 1 hr to starve the cells of glucose before being incubated in DMEM  
669 supplemented with 150 µg/ml 2-NBDG. Cells were allowed to grow in this medium  
670 for 6 hrs. Cells were harvested by trypsinization, thoroughly washed in phosphate-  
671 buffered saline (PBS) and resuspended in 500 µl of PBS. Cells were initially  
672 analyzed using a BD FACsCaliber and its software CellQuest Pro. The final data  
673 analysis was done using the software FlowJo.

674

### 675 **Total metabolite and flux analysis using <sup>13</sup>C-Gln**

676 The metabolic flux analysis using <sup>13</sup>C-Gln was performed by Human Metabolome  
677 Technologies, Inc. (<https://humanmetabolome.com/en/targeted.html>). Two biological  
678 replicates each of HEK293T and A549 cells were used for this experiment and  
679 grown in medium containing unlabelled Glc and Pyr, and <sup>13</sup>C-labelled Gln (<sup>13</sup>C-Gln).  
680 Samples were prepared according to guidelines of the service provider from 5 x 10<sup>6</sup>  
681 cells/ replicate and resuspended in 50 µl ultrapure water before measurements. The  
682 samples were analyzed using capillary electrophoresis time-of-flight mass  
683 spectrometry (CE-TOFMS, Agilent Technologies) in 2 modes to detect both anionic  
684 and cationic metabolites [64-66]. Detected peaks were then extracted using  
685 MasterHands ver. 2.17.1.11 to obtain m/z, migration time (MT) and peak area.  
686 Putative metabolites were assigned based on HMT's target library and their isotopic  
687 ions on the basis of m/z and MT. Absolute quantitations were performed for the total  
688 amount of each detected metabolite.

689

### 690 **ATPase activity assay with the TRAP1 mutant E115A/R402A**

691 **Protein expression and purification.** WT and TRAP1 mutant E115A/R402A were  
692 overexpressed in *Escherichia coli* BL21 (DE3)-RIL cells at 25°C following induction

693 with 0.4 mM isopropyl  $\beta$ -D-1-thiogalactopyranoside at O.D.<sub>600</sub> ~0.7. Cells were  
694 resuspended in buffer A (40 mM Tris-HCl pH 7.5, 400 mM KCl and 6 mM  $\beta$ -  
695 mercaptoethanol) and lysed using a microfluidizer. The cleared lysate was loaded  
696 onto a pre-equilibrated Ni-NTA agarose column (Qiagen) and washed with buffer A  
697 supplemented with 30 mM imidazole. Bound protein was eluted using a linear  
698 gradient from 30 to 500 mM imidazole in buffer A. Peak fractions were pooled, mixed  
699 with His<sub>6</sub>-TEV protease, and dialyzed against buffer B (25 mM Tris-HCl pH 8.0, 100  
700 mM NaCl and 6 mM  $\beta$ -mercaptoethanol). The liberated His-tag and His-TEV were  
701 removed by reapplying the sample to a Ni-NTA agarose column. Ammonium sulfate  
702 to a final concentration of 0.5 M was added to the flow-through, which was loaded  
703 onto a pre-equilibrated TOYOPEARL Butyl 600M column (Tosoh Bioscience), eluted  
704 using a linear gradient of 0.5 to 0 M ammonium sulfate in buffer C (25 mM Tris-HCl  
705 pH 8.0 and 6 mM  $\beta$ -mercaptoethanol), and dialyzed against buffer D (25 mM Tris-  
706 HCl pH 7.5, 100 mM KCl, and 6 mM  $\beta$ -mercaptoethanol).

707 **ATPase assay.** ATPase activities were determined with recombinant protein at 10  
708  $\mu$ M at 30°C in 30 mM HEPES/KOH pH 7.5, 50 mM KCl, 5 mM MgCl<sub>2</sub>, 2 mM DTT and  
709 2 mM ATP by measuring the amount of inorganic phosphate released after 30 min  
710 using the malachite green calorimetric assay [67].

711

## 712 **Isolation of mitochondria**

713 Mitochondria were isolated from cells grown in large 15 cm dishes to approximately  
714 95% (not 100%) confluency using a protocol adapted from Martinou and coworkers  
715 [68]. Briefly, cells were trypsinized, washed and pelleted in ice-cold PBS (1,000 rpm,  
716 5 min), and then re-suspended in 2 ml ice-cold MB buffer (10 mM Hepes pH 7.5, 210  
717 mM mannitol, 70 mM sucrose, 1 mM EDTA) and manually homogenized using a

718 Dounce homogenizer (50 times per sample). The homogenate was centrifuged at  
719 2,000 xg for 10 min to pellet nuclei and cell debris. The supernatant was spun again  
720 at 16,000 xg for 10 min. The resulting brown pellet contained mitochondria and was  
721 rigorously washed six times with ice-cold MB buffer by resuspending and  
722 centrifugation at 16,000 g for 10 min.

723

#### 724 **TRAP1 IPs**

725 For all IP experiments, the mitochondria isolated from cells expressing various  
726 TRAP1 constructs were resuspended in lysis buffer (10 mM Tris-HCl pH 7.5, 50 mM  
727 NaCl, 1mM EDTA, 1mM DTT, 10% glycerol, 10 mM sodium molybdate, 0.1% Triton  
728 X-100 and protease inhibitor cocktail (A32965, Thermo Scientific)) and lysed by  
729 sonication (35 cycles of 30 sec) using a Bioruptor (Diagenode). For all IPs, 1 mg  
730 clarified mitochondrial lysate was incubated overnight with 3 µg anti-HA antibody at  
731 4°C on a spinning rotor. The following day, 50 µl of Dynabeads-Protein G (10009D,  
732 Thermo Scientific) were added to the antibody-lysate mix and incubated at 4°C on a  
733 spinning rotor for 3 hrs. Following incubation, the Dynabeads were washed four  
734 times with lysis buffer. The proteins were eluted with NuPAGE sample buffer  
735 supplemented with 10 mM DTT.

736

#### 737 **TRAP1 mutant IP-MS analysis and comparison**

738 The TRAP1 mutant IP-MS analysis was performed by Poochon Scientific  
739 (<https://www.poochonscientific.com/services/protein-identification/>) with three  
740 biological replicates per sample and two replicates for controls. Briefly, 2 x 10<sup>6</sup>  
741 HEK293T cells were seeded in 15 cm dishes, grown and transfected with various  
742 constructs using the Jetprime transfection reagent at 70% confluency. 24hrs after

743 transfection, mitochondrial lysate preparation and IPs were performed as described  
744 above. 30 µl of the total IP sample for each IP (two controls and triplicates for the  
745 mutants) were run on a 4-12% gradient SDS-PAGE followed by in-gel trypsin  
746 digestion and LC/MS/MS analysis. The LC/MS/MS analyses of samples were carried  
747 out using a Thermo Scientific Q-Exactive hybrid quadrupole-orbitrap mass  
748 spectrometer and a Thermo Dionex UltiMate 3000 RSLCnano system. For each  
749 LC/MS/MS run, the tryptic peptide mixture was loaded onto a peptide trap cartridge  
750 set to a flow rate of 5µl/min. The trapped peptides were eluted onto a reversed-  
751 phase PicoFrit column (New Objective, Woburn, MA) using a linear gradient of  
752 acetonitrile (3-36%) in 0.1% formic acid. Eluted peptides from the PicoFrit column  
753 were then ionized and sprayed into the mass spectrometer, using a Nanospray Flex  
754 Ion Source ES071 (Thermo Scientific). For protein identification, two raw MS files  
755 from two LC/MS/MS runs for each sample were analyzed using the Thermo  
756 Proteome Discoverer 1.4.1 platform (Thermo Scientific, Bremen, Germany) for  
757 peptide identification and protein assembly. Database searches against the public  
758 human protein database obtained from the NCBI website were performed based on  
759 the SEQUEST and percolator algorithms through the Proteome Discoverer 1.4.1  
760 platform. The minimum peptide length was specified to be five amino acids. The  
761 precursor mass tolerance was set to 15 ppm and the fragment mass tolerance was  
762 set to 0.05 Da. The maximum false peptide discovery rate was specified as 0.01.  
763 Finally, the estimation of relative protein abundance was based on PSMs. For further  
764 comparison of relative abundance of interacting proteins for a particular mutant or for  
765 WT TRAP1, all data were normalized to 100 PSMs for the immunoprecipitated  
766 TRAP1 protein in a given replicate.

767

## 768 **Stable isotope labeling by amino acids in cell culture (SILAC)**

769 SILAC was performed as follows. As culture medium, DMEM deprived of lysine and  
770 arginine was used together with dialyzed fetal bovine serum (10 kDa cutoff). For light  
771 medium, L-lysine-2HCl was added to a final concentration of 146.2 mg/l and L-  
772 arginine-HCl was added to a final concentration of 84 mg/l. For heavy medium, L-  
773 lysine-2HCl ( $^{13}\text{C}_6$ ,  $^{15}\text{N}_2$ ) was added to a final concentration of 181.2 mg/l and L-  
774 arginine-HCl ( $^{13}\text{C}_6$ ,  $^{15}\text{N}_4$ ) was added to a final concentration of 87.8 mg/l. Heavy and  
775 light SILAC labeling was achieved by culturing UMUC3 cells in the respective media  
776 for 5 cell doublings (replenishing media every 2-3 days). Care was taken to maintain  
777 the UMUC3 cell cultures in their log phase of growth. Separate stable cultures of WT  
778 and TRAP1 KO UMUC3 cells were established in both heavy and light DMEM. After  
779 5 cell doublings, heavy labeling efficiency was determined to be >95%. At this point,  
780 comparative steady-state protein expression in both heavy-labeled KO cells and  
781 light-labeled WT cells (or vice versa) was performed in triplicate samples (biological  
782 replicates) by the Mass Spectrometry Section of the Collaborative Protein  
783 Technology Resource (Center for Cancer Research, National Cancer Institute,  
784 Bethesda, MD).

785

## 786 **LFQ MS analysis**

787 Three biological replicates of  $9 \times 10^6$  WT and KO HEK293T and HCT116 cells grown  
788 in different carbon source cocktails (Glc + Pyr + Gln, Gal+ Pyr and Gln only) were  
789 pooled together and lysed in FASP lysis buffer (100 mM Tris-HCl pH 7.5, 4% SDS,  
790 10 mM TCEP) at 95 °C for 5 min followed by centrifugation at 14,000 g for 10 min.  
791 100 µg of each clarified sample were digested by the FASP method [69]. 50 µg of  
792 the resulting peptide mixtures were desalted on Waters SEP-PAK C18 micro elution



793 plates and eluted with 100  $\mu$ l of 40% acetonitrile, 0.1% formic acid. 6  $\mu$ l of the eluate  
794 were used for the MS analysis using a Thermo Scientific Q-Exactive hybrid  
795 quadrupole orbitrap fusion mass spectrometer. Data analysis was done using  
796 MaxQuant and Perseus.

797

## 798 **Native-PAGE**

799 30  $\mu$ g total mitochondrial protein extracts were resolved on 6% or 8% Tris-glycine  
800 clear native gels. The pH values for the stacking and separating parts of the gels,  
801 and for the running buffer were 8.8 and 6.8, and 8.3, respectively. Gels were run at  
802 80 V for 5-6 hrs at 4°C. The resolved proteins were transferred onto nitrocellulose  
803 membranes overnight at 30 V at 4°C. TRAP1 complexes were revealed by  
804 immunoblotting with an anti-TRAP1 antibody (BD Biosciences).

805

## 806 **Drug treatments**

807  $2 \times 10^6$  HEK293T, HCT116, MCF-7, MDA-MB-134 or PC3 cells were seeded and  
808 grown to 90-95% confluency in 15 cm plates. Depending on the experiment, the cells  
809 were treated with 10  $\mu$ M oligomycin (complex V inhibitor), rotenone (complex I  
810 inhibitor) or antimycin (complex III inhibitor) for 2, 4, 6 or 8 hrs in medium containing  
811 Glc, Pyr and Gln as carbon sources. Following drug treatments, mitochondrial  
812 extracts were prepared and native PAGE run as described above. For LDH  
813 inhibition, 5  $\mu$ M of the LDHi was used for 2, 4 and 6 hrs.

814

## 815 **TRAP1-GST pulldown**

816  $2 \times 10^6$  HEK293T cells were seeded in 15 cm dishes, grown and transfected with  
817 expression vectors for TRAP-GST and GST using the Jetprime transfection reagent

818 at 70% confluency. 24 hrs after transfection, mitochondrial lysates were prepared in  
819 lysis buffer (10 mM Tris-HCl pH 7.5, 50 mM NaCl, 1mM EDTA, 0.1% Triton X-100,  
820 1mM DTT, 10% glycerol, 10 mM sodium molybdate, protease inhibitor cocktail  
821 (A32965, Thermo Scientific)) as described before. 1 mg clarified mitochondrial  
822 lysates prepared in lysis buffer was incubated overnight with 50  $\mu$ l glutathione-  
823 conjugated magnetic agarose beads (Thermo Scientific) at 4°C on a spinning rotor.  
824 The beads were washed four times with the same buffer and the proteins were  
825 eluted at room temperature in the same buffer supplemented with 80 mM reduced  
826 glutathione. The eluted samples were immediately run on a 6% clear native gel and  
827 processed for MS as illustrated in Additional file 12: Figure S5a.

828

### 829 **MS analysis of oligomeric TRAP1 complex**

830 The TRAP1 complexes from the GST pulldowns were visualized on the native gels  
831 by staining with coomassie brilliant blue (CBB G-250) followed by sequential  
832 destaining. The portion of the gel containing the stained TRAP1-GST complex was  
833 extracted as shown in Additional file 12: Figure S5a (equivalent position on the gel  
834 was extracted for controls; see Additional file 12: Figure S5a). The extracted gel  
835 slices were first reduced with DTT and then alkylated with iodoacetamide. Next, the  
836 samples were trypsin digested. The digested peptide mixture was then concentrated  
837 and desalted using C18 Zip-Tip. The desalted peptides were reconstituted in 20  $\mu$ l of  
838 0.1% formic acid. From this, 18  $\mu$ l of peptides were analyzed by LC/MS/MS using a  
839 Thermo Scientific Q-Exactive hybrid quadrupole-orbitrap mass spectrometer and a  
840 Thermo Dionex UltiMate 3000 RSLCnano System as described above for TRAP1 IP-  
841 MS. Proteins in the oligomeric TRAP1 complex were determined by filtering the data  
842 for proteins with a high number of unique peptides and cross-referencing with the

843 GST control to eliminate overlapping proteins as illustrated in Additional file 12:  
844 Figure S5b.

845

#### 846 **Q-PCR analysis**

847  $2 \times 10^5$  WT HEK293T cells were seeded in 6 well plates overnight. On day 2, one set  
848 was transfected with a HIF1 $\alpha$  expression vector [70] (see Additional file 16: Table  
849 S9) using the Jetprime transfection reagent. On the same day, one set was exposed  
850 to hypoxia (1% O<sub>2</sub>, overnight) and the third set was left in normoxia. On day 3, each  
851 set was collected and analyzed by quantitative reverse-transcription PCR (RT-PCR)  
852 with specific primers (Additional file 16: Table S9). Briefly, RNA was isolated with the  
853 acid guanidinium thiocyanate-phenol-chloroform method [71]. 500 ng RNA was used  
854 for reverse transcription using random primers and the GoScript master mix  
855 according to the manufacturer's instructions (Promega). Quantitative real-time PCR  
856 was used to examine the expression levels of *TRAP1* and *HIF1A* with *GAPDH* as the  
857 reference gene.

858

#### 859 **Statistical analyses**

860 Data analysis was primarily performed using Graphpad Prism 8, Perseus (MS) and  
861 Microsoft Excel. The differences between various groups was analyzed with a two  
862 tailed Students t-test. Until specified, the error bars represent the standard error of  
863 the mean with \* $p < 0.05$ , \*\* $p < 0.01$ , and \*\*\* $p < 0.001$  denoting the difference between  
864 the means of two compared groups considered to be statistically significant. Each  
865 real-time OCR tracing profile shown represents a cumulative plot of three technical  
866 replicates per cell type.

867

868

869 **Additional files**

870

871 **Additional file 1: Figure S1. Generation of TRAP1 KO cells and additional**  
872 **metabolic profiling.**

873 (a) Workflow for the generation of CRISPR/Cas9-mediated TRAP1 KO clones.

874 Unlike HEK293T and HCT116 clones, A549 and UMUC3 TRAP1 KO clones were  
875 isolated by fluorescence-activated cell sorting using a vector allowing mCherry  
876 expression (see Additional file 16: Table S9).

877 (b) OCR traces of WT and KO HCT116 cells with Glc + Pyr + Gln as carbon sources.

878 (c-i) OCR and ECAR traces of WT and KO HEK293T or HCT116 cells with different  
879 primary carbon sources.

880

881 **Additional file 2: Figure S2. Carbon flux and total quantitation of target**  
882 **metabolites.**

883 (a) Schematic metabolic map showing the flow and distribution of  $^{13}\text{C}$  atoms in  
884 metabolites of the TCA cycle when cells consume  $^{13}\text{C}$ -Gln. Note that most of these  
885 metabolites traced with  $^{13}\text{C}$ -Gln were found to be upregulated in TRAP1 KO cells.

886 (b, c) Total quantitation of target metabolites in WT and KO HEK293T and A549  
887 cells. Note that this is “total” quantitation and should not be confused with  $^{13}\text{C}$   
888 tracing. Total quantitation must be combined with the information provided in  
889 Additional file 4: Table S2 to infer metabolites with increased  $^{13}\text{C}$  incorporation. Data  
890 points on bar graphs indicate metabolite concentration per  $10^6$  cells from each  
891 biological replicate (n = 2).

892

893 **Additional file 3: Table S1.** Quantitative estimation of target metabolites in  
894 HEK293T and A549 cells.

895

896 **Additional file 4: Table S2.** Quantitative  $^{13}\text{C}$  tracing in target metabolites in  
897 HEK293T and A549 cells.

898

899 **Additional file 5: Figure S3. TRAP1 truncation and point mutants.**

900 (a) Schematic representation of the constructs for expression of mitochondrially  
901 targeted TRAP1 and EGFP.

902 (b) Fluorescence micrographs showing proper targeting of mitoEGFP to  
903 mitochondria. Mitochondria are revealed with Mitotracker<sup>RED</sup>.

904 (c) Expression analysis of TRAP1 truncation mutants by immunoblotting with an  
905 antibody to their HA-tag.

906 (d) ATPase activity assay for the TRAP1 double mutant E115A/R402A.

907 (e) Quantitation of basal respiration rates in WT versus KO HEK293T cells  
908 expressing the indicated proteins. Note that all ATPase mutants can rescue the KO  
909 phenotype to WT levels.

910

911 **Additional file 6: Figure S4. Analysis of the whole cell proteome and TRAP1-**  
912 **associated proteins.**

913 (a) Control immunoblot performed to check TRAP1 WT and mutant expression in the  
914 KO cells used for the IP-MS experiments.

915 (b, c) Comparative relative abundance of proteins immunoprecipitated with the  
916 indicated TRAP1 ATPase mutants or WT TRAP1. The scatterplot was generated as  
917 mentioned in the legend to Fig. 4a.

918 (d, e) Scatter plots comparing the levels (LFQ intensities) of the 2660 high  
919 confidence proteins between WT and KO HEK293T or HCT116 cells.

920

921 **Additional file 7: Table S3.** List of all identified proteins pulled down with TRAP1  
922 using an IP-MS analysis with WT TRAP1, and the TRAP1 mutants E115A/R402A  
923 and  $\Delta$ Strap.

924

925 **Additional file 8: Table S4.** List of high confidence TRAP1 interacting proteins (from  
926 Additional file 10: Table S3) filtered for mitochondrial localization and a minimum of 4  
927 or more identified unique peptides (with a few exceptions).

928

929 **Additional file 9: Table S5.** List of mitochondrial proteins identified in the SILAC  
930 analysis comparing WT to TRAP1 KO UMUC3 cells. Note that only those proteins  
931 were considered that were identified and quantitated in all three replicates.

932

933 **Additional file 10: Table S6.** Complete list of proteins identified in whole cell LFQ  
934 MS analysis to compare WT to TRAP1 KO HEK293T and HCT116 cells.

935

936 **Additional file 11: Table S7.** List of high confidence proteins identified in whole cell  
937 LFQ analysis to compare WT to TRAP1 KO HEK293T and HCT116 cells. The 4578  
938 proteins from Additional file 10: Table S6 were reduced to 2660 by selecting only  
939 those with at least 7 identified unique peptides in the LFQ analysis.

940

941 **Additional file 12: Figure S5. An extension of Figure 5 showing TRAP1-GST**  
942 **pulldown MS strategy and analysis.**

943 (a) TRAP1-GST pulldown strategy.

944 (b) Venn diagram of the proteins identified by the MS analysis. Note that TRAP1  
945 peptides are the only unique ones in the TRAP1-GST pulldown samples compared  
946 to the GST controls.

947

948 **Additional file 13: Table S8.** TRAP1 complex MS analysis.

949

950 **Additional file 14: Figure S6. TRAP1 is not induced by HIF1 $\alpha$  and the TRAP1**  
951 **complex is ubiquitous.**

952 (a) Quantitative RT-PCR analysis of the mRNA levels for HIF1 $\alpha$  and TRAP1. All data  
953 are reported as means  $\pm$  SEM (n = 3).

954 (b) Analysis of TRAP1 complexes from indicated cell lines by native PAGE and SDS-  
955 PAGE.

956

957 **Additional file 15: Figure S7. Differential effects of drug treatments on the**  
958 **TRAP1 complex.**

959

960 **Additional file 16: Table S9.** List of reagents and resources.

961

962

### 963 **Acknowledgements**

964 We thank Jean-Claude Martinou for invaluable discussions regarding this project.

965

### 966 **Funding**

967 This study has been supported by the National Institutes of Health (grant R01-  
968 GM111084) to F.T.F.T., by funds from the Intramural Research Program, National  
969 Cancer Institute, Center for Cancer Research (L.N.), and the Swiss National Science  
970 Foundation, and the Canton de Genève (D.P.). The funders were not involved in the  
971 research or the preparation of this manuscript.

972

### 973 **Availability of data and materials**

974 All data generated during this study are included in either the published article or its  
975 Additional files.

976

### 977 **Authors' contributions**

978 A.J. conceived the study, designed and performed experiments, analyzed the data,  
979 prepared figures, and wrote the manuscript. J.D. designed and performed the  
980 quantitative metabolic flux and SILAC experiments. N.G. performed and analyzed  
981 the Q-PCR data. J.L. and F.T.F.T. purified the TRAP1 E115A/R402A mutant and  
982 performed and analyzed its ATPase activity. G.S. helped in the analysis of SILAC  
983 data. K.B. helped with the analysis of proteomics data. L.N. contributed to  
984 understanding metabolic dynamics, designing and supervising experiments, and to  
985 writing the manuscript. D.P. supervised the work, contributed to designing  
986 experiments, and wrote and critically edited the manuscript. All authors contributed  
987 to the overall editing of the manuscript.

988

### 989 **Competing interests**

990 The authors declare that they have no competing interests.



## 991 **References**

- 992 1. Hanahan D, Weinberg Robert A. Hallmarks of cancer: the next generation.  
993 Cell. 2011;144(5):646-74.
- 994 2. Schulze A, Harris AL. How cancer metabolism is tuned for proliferation and  
995 vulnerable to disruption. Nature. 2012;491:364.
- 996 3. Yoshida S, Tsutsumi S, Muhlebach G, Sourbier C, Lee M-J, Lee S,  
997 Vartholomaiou E, et al. Molecular chaperone TRAP1 regulates a metabolic  
998 switch between mitochondrial respiration and aerobic glycolysis. Proc Natl  
999 Acad Sci USA. 2013;110(17):E1604-E12.
- 1000 4. Sciacovelli M, Guzzo G, Morello V, Frezza C, Zheng L, Nannini N, Calabrese  
1001 F, et al. The mitochondrial chaperone TRAP1 promotes neoplastic growth by  
1002 inhibiting succinate dehydrogenase. Cell Metab. 2013;17(6):988-99.
- 1003 5. Masgras I, Sanchez-Martin C, Colombo G, Rasola A. The chaperone TRAP1  
1004 as a modulator of the mitochondrial adaptations in cancer cells. Front Oncol.  
1005 2017;7(58):58.
- 1006 6. Rasola A, Neckers L, Picard D. Mitochondrial oxidative phosphorylation  
1007 TRAP(1)ped in tumor cells. Trends Cell Biol. 2014;24(8):455-63.
- 1008 7. Felts SJ, Owen BA, Nguyen P, Trepel J, Donner DB, Toft DO. The hsp90-  
1009 related protein TRAP1 is a mitochondrial protein with distinct functional  
1010 properties. J Biol Chem. 2000;275(5):3305-12.
- 1011 8. Cechetto JD, Gupta RS. Immunoelectron microscopy provides evidence that  
1012 tumor necrosis factor receptor-associated protein 1 (TRAP-1) is a  
1013 mitochondrial protein which also localizes at specific extramitochondrial sites.  
1014 Exp Cell Res. 2000;260(1):30-9.

- 1015 9. Kang BH. TRAP1 regulation of mitochondrial life or death decision in cancer  
1016 cells and mitochondria-targeted TRAP1 inhibitors. *BMB Rep.* 2012;45(1):1-6.
- 1017 10. Lavery LA, Partridge JR, Ramelot TA, Elnatan D, Kennedy MA, Agard DA.  
1018 Structural asymmetry in the closed state of mitochondrial Hsp90 (TRAP1)  
1019 supports a two-step ATP hydrolysis mechanism. *Mol Cell.* 2014;53(2):330-43.
- 1020 11. Picard D. Preface to Hsp90. *Biochim Biophys Acta.* 2012;1823(3):605-6.
- 1021 12. Röhl A, Rohrberg J, Buchner J. The chaperone Hsp90: changing partners for  
1022 demanding clients. *Trends Biochem Sci.* 2013;38(5):253-62.
- 1023 13. Schopf FH, Biebl MM, Buchner J. The HSP90 chaperone machinery. *Nat Rev*  
1024 *Mol Cell Biol.* 2017;18(6):345-60.
- 1025 14. Sung N, Lee J, Kim JH, Chang C, Joachimiak A, Lee S, Tsai FT.  
1026 Mitochondrial Hsp90 is a ligand-activated molecular chaperone coupling ATP  
1027 binding to dimer closure through a coiled-coil intermediate. *Proc Natl Acad Sci*  
1028 *USA.* 2016;113(11):2952-7.
- 1029 15. Elnatan D, Betegon M, Liu Y, Ramelot T, Kennedy MA, Agard DA. Symmetry  
1030 broken and rebroken during the ATP hydrolysis cycle of the mitochondrial  
1031 Hsp90 TRAP1. *eLife.* 2017;6:e25235.
- 1032 16. Sung N, Lee J, Kim JH, Chang C, Tsai FT, Lee S. 2.4 Å resolution crystal  
1033 structure of human TRAP1NM, the Hsp90 paralog in the mitochondrial matrix.  
1034 *Acta Crystallogr D Struct Biol.* 2016;72(Pt 8):904-11.
- 1035 17. Li J, Soroka J, Buchner J. The Hsp90 chaperone machinery: Conformational  
1036 dynamics and regulation by co-chaperones. *Biochim Biophys Acta.*  
1037 2012;1823(3):624-35.

- 1038 18. Chae YC, Angelin A, Lisanti S, Kossenkov AV, Speicher KD, Wang H, Powers  
1039 JF, et al. Landscape of the mitochondrial Hsp90 metabolome in tumours. *Nat*  
1040 *Commun.* 2013;4:2139.
- 1041 19. Park HK, Hong JH, Oh YT, Kim SS, Yin J, Lee AJ, Chae YC, et al. Interplay  
1042 between TRAP1 and sirtuin-3 modulates mitochondrial respiration and  
1043 oxidative stress to maintain stemness of glioma stem cells. *Cancer Res.*  
1044 2019;79(7):1369-82.
- 1045 20. Vander Heiden MG, DeBerardinis RJ. Understanding the intersections  
1046 between metabolism and cancer biology. *Cell.* 2017;168(4):657-69.
- 1047 21. Aguer C, Gambarotta D, Mailloux RJ, Moffat C, Dent R, McPherson R, Harper  
1048 ME. Galactose enhances oxidative metabolism and reveals mitochondrial  
1049 dysfunction in human primary muscle cells. *PLoS One.* 2011;6(12):e28536.
- 1050 22. Owen OE, Kalhan SC, Hanson RW. The key role of anaplerosis and  
1051 cataplerosis for citric acid cycle function. *J Biol Chem.* 2002;277(34):30409-  
1052 12.
- 1053 23. Hua G, Zhang Q, Fan Z. Heat shock protein 75 (TRAP1) antagonizes reactive  
1054 oxygen species generation and protects cells from granzyme M-mediated  
1055 apoptosis. *J Biol Chem.* 2007;282(28):20553-60.
- 1056 24. Panaretou B, Prodromou C, Roe SM, O'Brien R, Ladbury JE, Piper PW, Pearl  
1057 LH. ATP binding and hydrolysis are essential to the function of the Hsp90  
1058 molecular chaperone in vivo. *EMBO J.* 1998;17(16):4829-36.
- 1059 25. Grenert JP, Johnson BD, Toft DO. The importance of ATP binding and  
1060 hydrolysis by hsp90 in formation and function of protein heterocomplexes. *J*  
1061 *Biol Chem.* 1999;274(25):17525-33.

- 1062 26. Obermann WM, Sondermann H, Russo AA, Pavletich NP, Hartl FU. In vivo  
1063 function of Hsp90 is dependent on ATP binding and ATP hydrolysis. *J Cell*  
1064 *Biol.* 1998;143(4):901-10.
- 1065 27. Zhao R, Davey M, Hsu YC, Kaplanek P, Tong A, Parsons AB, Krogan N, et al.  
1066 Navigating the chaperone network: an integrative map of physical and genetic  
1067 interactions mediated by the hsp90 chaperone. *Cell.* 2005;120(5):715-27.
- 1068 28. Echeverria PC, Bernthaler A, Dupuis P, Mayer B, Picard D. An interaction  
1069 network predicted from public data as a discovery tool: application to the  
1070 Hsp90 molecular chaperone machine. *PLoS One.* 2011;6(10):e26044.
- 1071 29. Taipale M, Tucker G, Peng J, Krykbaeva I, Lin ZY, Larsen B, Choi H, et al. A  
1072 quantitative chaperone interaction network reveals the architecture of cellular  
1073 protein homeostasis pathways. *Cell.* 2014;158(2):434-48.
- 1074 30. Taipale M, Jarosz DF, Lindquist S. HSP90 at the hub of protein homeostasis:  
1075 emerging mechanistic insights. *Nat Rev Mol Cell Biol.* 2010;11(7):515-28.
- 1076 31. Guzzo G, Sciacovelli M, Bernardi P, Rasola A. Inhibition of succinate  
1077 dehydrogenase by the mitochondrial chaperone TRAP1 has anti-oxidant and  
1078 anti-apoptotic effects on tumor cells. *Oncotarget.* 2014;5(23):11897-908.
- 1079 32. Kang BH, Plescia J, Dohi T, Rosa J, Doxsey SJ, Altieri DC. Regulation of  
1080 tumor cell mitochondrial homeostasis by an organelle-specific Hsp90  
1081 chaperone network. *Cell.* 2007;131(2):257-70.
- 1082 33. Pridgeon JW, Olzmann JA, Chin LS, Li L. PINK1 protects against oxidative  
1083 stress by phosphorylating mitochondrial chaperone TRAP1. *PLoS Biol.*  
1084 2007;5(7):e172.
- 1085 34. Fitzgerald JC, Zimprich A, Carvajal Berrio DA, Schindler KM, Maurer B,  
1086 Schulte C, Bus C, et al. Metformin reverses TRAP1 mutation-associated

- 1087 alterations in mitochondrial function in Parkinson's disease. *Brain*.  
1088 2017;140(9):2444-59.
- 1089 35. Masola B, Ngubane NP. The activity of phosphate-dependent glutaminase  
1090 from the rat small intestine is modulated by ADP and is dependent on integrity  
1091 of mitochondria. *Archives of Biochemistry and Biophysics*. 2010;504(2):197-  
1092 203.
- 1093 36. Nelson D, Rumsey WL, Erecinska M. Glutamine catabolism by heart muscle:  
1094 regulation of phosphate-activated glutaminase by ATP, citrate, and chloride.  
1095 *Arch Biochem Biophys*. 1994;314(2):376-83.
- 1096 37. Millson SH, Truman AW, Wolfram F, King V, Panaretou B, Prodromou C,  
1097 Pearl LH, et al. Investigating the protein-protein interactions of the yeast  
1098 Hsp90 chaperone system by two-hybrid analysis: potential uses and  
1099 limitations of this approach. *Cell Stress Chaperones*. 2004;9(4):359-68.
- 1100 38. Wittig I, Schägger H. Advantages and limitations of clear-native PAGE.  
1101 *Proteomics*. 2005;5(17):4338-46.
- 1102 39. Solaini G, Baracca A, Lenaz G, Sgarbi G. Hypoxia and mitochondrial  
1103 oxidative metabolism. *Biochim Biophys Acta*. 2010;1797(6):1171-7.
- 1104 40. Masgras I, Ciscato F, Brunati AM, Tibaldi E, Indraccolo S, Curtarello M,  
1105 Chiara F, et al. Absence of neurofibromin induces an oncogenic metabolic  
1106 switch via mitochondrial ERK-mediated phosphorylation of the chaperone  
1107 TRAP1. *Cell Rep*. 2017;18(3):659-72.
- 1108 41. Lisanti S, Tavecchio M, Chae YC, Liu Q, Brice AK, Thakur ML, Languino LR,  
1109 et al. Deletion of the mitochondrial chaperone TRAP-1 uncovers global  
1110 reprogramming of metabolic networks. *Cell Rep*. 2014;8(3):671-7.

- 1111 42. Zierer BK, Rubbelke M, Toppel F, Madl T, Schopf FH, Rutz DA, Richter K, et  
1112 al. Importance of cycle timing for the function of the molecular chaperone  
1113 Hsp90. *Nat Struct Mol Biol.* 2016;23(11):1020-8.
- 1114 43. Balasubramanian A, Markovski M, Hoskins JR, Doyle SM, Wickner S. Hsp90  
1115 of *E. coli* modulates assembly of FtsZ, the bacterial tubulin homolog. *Proc*  
1116 *Natl Acad Sci USA.* 2019;116(25):12285-94.
- 1117 44. Elnatan D, Agard DA. Calcium binding to a remote site can replace  
1118 magnesium as cofactor for mitochondrial Hsp90 (TRAP1) ATPase activity. *J*  
1119 *Biol Chem.* 2018;293(35):13717-24.
- 1120 45. Wu Z, Gholami AM, Kuster B. Systematic identification of the HSP90  
1121 candidate regulated proteome. *Mol Cell Proteomics.* 2012;11(6):M111  
1122 016675.
- 1123 46. Echeverria PC, Bhattacharya K, Joshi A, Wang T, Picard D. The sensitivity to  
1124 Hsp90 inhibitors of both normal and oncogenically transformed cells is  
1125 determined by the equilibrium between cellular quiescence and activity. *PLOS*  
1126 *ONE.* 2019;14(2):e0208287.
- 1127 47. Weidenauer L, Wang T, Joshi S, Chiosis G, Quadroni MR. Proteomic  
1128 interrogation of HSP90 and insights for medical research. *Expert Rev*  
1129 *Proteomics.* 2017;14(12):1105-17.
- 1130 48. Rodina A, Wang T, Yan P, Gomes ED, Dunphy MPS, Pillarsetty N, Koren J,  
1131 et al. The epichaperome is an integrated chaperome network that facilitates  
1132 tumour survival. *Nature.* 2016;538:397.
- 1133 49. Fierro-Monti I, Echeverria P, Racle J, Hernandez C, Picard D, Quadroni M.  
1134 Dynamic impacts of the inhibition of the molecular chaperone Hsp90 on the T-

- 1135 cell proteome have implications for anti-cancer therapy. PLOS ONE.  
1136 2013;8(11):e80425.
- 1137 50. Echeverría PC, Picard D. A global view of the proteome perturbations by  
1138 Hsp90 inhibitors. In: Houry WA, editor. The molecular chaperones interaction  
1139 networks in protein folding and degradation: Springer; 2014. p. 133-50.
- 1140 51. Moran Luengo T, Kityk R, Mayer MP, Rüdiger SGD. Hsp90 breaks the  
1141 deadlock of the Hsp70 chaperone system. Mol Cell. 2018;70(3):545-52.
- 1142 52. Genest O, Wickner S, Doyle SM. Hsp90 and Hsp70 chaperones:  
1143 Collaborators in protein remodeling. J Biol Chem. 2019;294(6):2109-20.
- 1144 53. Lee C, Park HK, Jeong H, Lim J, Lee AJ, Cheon KY, Kim CS, et al.  
1145 Development of a mitochondria-targeted Hsp90 inhibitor based on the crystal  
1146 structures of human TRAP1. J Am Chem Soc. 2015;137(13):4358-67.
- 1147 54. Cheng MY, Hartl FU, Horwich AL. The mitochondrial chaperonin hsp60 is  
1148 required for its own assembly. Nature. 1990;348(6300):455-8.
- 1149 55. Moullintraffort L, Bruneaux M, Nazabal A, Allegro D, Giudice E, Zal F, Peyrot  
1150 V, et al. Biochemical and biophysical characterization of the Mg<sup>2+</sup>-induced  
1151 90-kDa heat shock protein oligomers. J Biol Chem. 2010;285(20):15100-10.
- 1152 56. Lepvrier E, Moullintraffort L, Nigen M, Goude R, Allegro D, Barbier P, Peyrot  
1153 V, et al. Hsp90 oligomers interacting with the Aha1 cochaperone: an outlook  
1154 for the Hsp90 chaperone machineries. Anal Chem. 2015;87(14):7043-51.
- 1155 57. Lepvrier E, Nigen M, Moullintraffort L, Chat S, Allegro D, Barbier P, Thomas  
1156 D, et al. Hsp90 oligomerization process: How can p23 drive the chaperone  
1157 machineries? Biochim Biophys Acta. 2015;1854(10 Pt A):1412-24.

- 1158 58. Shiau AK, Harris SF, Southworth DR, Agard DA. Structural Analysis of *E. coli*  
1159 hsp90 reveals dramatic nucleotide-dependent conformational  
1160 rearrangements. *Cell*. 2006;127(2):329-40.
- 1161 59. Chretien D, Benit P, Ha HH, Keipert S, El-Khoury R, Chang YT, Jastroch M,  
1162 et al. Mitochondria are physiologically maintained at close to 50 degrees C.  
1163 *PLoS Biol*. 2018;16(1):e2003992.
- 1164 60. Bosetti F, Yu G, Zucchi R, Ronca-Testoni S, Solaini G. Myocardial ischemic  
1165 preconditioning and mitochondrial F1F0-ATPase activity. *Mol Cell Biochem*.  
1166 2000;215(1-2):31-7.
- 1167 61. Ran FA, Hsu PD, Wright J, Agarwala V, Scott DA, Zhang F. Genome  
1168 engineering using the CRISPR-Cas9 system. *Nat Protoc*. 2013;8(11):2281-  
1169 308.
- 1170 62. Rai G, Brimacombe KR, Mott BT, Urban DJ, Hu X, Yang SM, Lee TD, et al.  
1171 Discovery and optimization of potent, cell-active pyrazole-based inhibitors of  
1172 lactate dehydrogenase (LDH). *J Med Chem*. 2017;60(22):9184-204.
- 1173 63. Yeung C, Gibson AE, Issaq SH, Oshima N, Baumgart JT, Edessa LD, Rai G,  
1174 et al. Targeting glycolysis through inhibition of LDH impairs tumor growth in  
1175 preclinical models of Ewing sarcoma. *Cancer Res*. 2019;in press.
- 1176 64. Soga T, Heiger DN. Amino acid analysis by capillary electrophoresis  
1177 electrospray ionization mass spectrometry. *Anal Chem*. 2000;72(6):1236-41.
- 1178 65. Soga T, Ueno Y, Naraoka H, Ohashi Y, Tomita M, Nishioka T. Simultaneous  
1179 determination of anionic intermediates for *Bacillus subtilis* metabolic pathways  
1180 by capillary electrophoresis electrospray ionization mass spectrometry. *Anal*  
1181 *Chem*. 2002;74(10):2233-9.



- 1182 66. Soga T, Ohashi Y, Ueno Y, Naraoka H, Tomita M, Nishioka T. Quantitative  
1183 metabolome analysis using capillary electrophoresis mass spectrometry. *J*  
1184 *Proteome Res.* 2003;2(5):488-94.
- 1185 67. Carter SG, Karl DW. Inorganic phosphate assay with malachite green: an  
1186 improvement and evaluation. *J Biochem Biophys Methods.* 1982;7(1):7-13.
- 1187 68. Da Cruz S, Xenarios I, Langridge J, Vilbois F, Parone PA, Martinou JC.  
1188 Proteomic analysis of the mouse liver mitochondrial inner membrane. *J Biol*  
1189 *Chem.* 2003;278(42):41566-71.
- 1190 69. Wiśniewski JR, Zougman A, Nagaraj N, Mann M. Universal sample  
1191 preparation method for proteome analysis. *Nat Methods.* 2009;6:359.
- 1192 70. Kondo K, Klco J, Nakamura E, Lechpammer M, Kaelin WG, Jr. Inhibition of  
1193 HIF is necessary for tumor suppression by the von Hippel-Lindau protein.  
1194 *Cancer Cell.* 2002;1(3):237-46.
- 1195 71. Chomczynski P, Sacchi N. Single-step method of RNA isolation by acid  
1196 guanidinium thiocyanate-phenol-chloroform extraction. *Anal Biochem.*  
1197 1987;162:156-9.
- 1198

## 1199 **Figure legends**

1200

### 1201 **Figure 1. Real-time metabolic profiling of human TRAP1 KO cells.**

1202 (a) Representative real-time traces of basal OCR of WT and TRAP1 KO HEK293T  
1203 cells with Glc + Pyr + Gln as carbon sources followed by injection of the ATP-  
1204 synthase inhibitor (oligomycin at 5  $\mu$ M) to block mitochondrial respiration.

1205 (b and c) Quantitation of basal respiration rates (b) and ATP production (c). ATP  
1206 production is calculated as (last measurement before oligomycin injection) -  
1207 (minimum rate measured after oligomycin injection).

1208 (d) Comparative energy profiles. The baseline phenotype indicates OCR and ECAR  
1209 of cells with starting non-limiting assay conditions; the stressed phenotype indicates  
1210 OCR and ECAR upon exposure to metabolic inhibitors.

1211 (e, f) OCR traces with and without the overexpression of TRAP1 or mitoEGFP in  
1212 HEK293T KO (e) and HCT116 TRAP1 KO (f) cells. The mitochondrial stress test  
1213 profile is obtained by sequential injection of oligomycin (5  $\mu$ M), the uncoupler FCCP  
1214 (2  $\mu$ M) and the complex I and III inhibitors rotenone (1  $\mu$ M) and antimycin (1  $\mu$ M),  
1215 respectively.

1216 (g-i) Comparison of basal OCR of WT and KO HEK293T cells with Glc (g), Pyr (h),  
1217 and Gln (i) as the only carbon sources.

1218 (j) Flow cytometric quantitation of glucose uptake using 2-NBDG (150  $\mu$ g/ml) with  
1219 WT and two independent TRAP1 KO HEK293T clones.

1220 (k) ECAR traces showing basal glycolytic rates of WT and KO HEK293T cells with  
1221 Glc as the only carbon source before and after the addition of oligomycin.

1222 (l, m) OCR traces of WT and KO HEK293T cells grown in media with Gal + Pyr (l)  
1223 and Gln (m) as the only carbon sources.

1224 All data are reported as means  $\pm$  SEM (n = 3) with asterisks in the bar graphs  
1225 indicating statistically significant differences (\*p<0.05, \*\*p<0.01, and \*\*\*p<0.001).

1226

1227 **Figure 2. Absolute quantitation of traced metabolites in WT and KO cells.**

1228 (a-c) Quantitation of total glutamine and glutamate levels (a), TCA cycle metabolites

1229 (b), and reduced (GSH) and oxidized glutathione (GSSG) (c) in WT and KO

1230 HEK293T and A549 cells. The absolute quantitation shown is for metabolites with

1231 increased  $^{13}\text{C}$  abundance from labelled glutamine (see data in Additional file 4: Table

1232 S2). Data points on bar graphs indicate metabolite concentration per  $10^6$  cells from

1233 each biological replicate (n = 2).

1234

1235 **Figure 3. Analysis of the TRAP1 structure activity relationship for metabolic  
1236 regulation.**

1237 (a) OCR traces of WT versus KO HEK293T cells exogenously expressing the control  
1238 proteins mitoEGFP or WT TRAP1, or the TRAP1 truncation mutants MTS-N, MTS-M  
1239 and MTS-C.

1240 (b) Quantitation of the basal respiration rates of WT versus KO HEK293T cells  
1241 expressing the indicated proteins.

1242 (c) OCR traces; experiments as in panel a, but with the TRAP1 truncation mutants  
1243 MTS-N+M and MTS-M+C.

1244 (d) Quantitation of the basal respiration rates of WT versus KO cells expressing the  
1245 indicated proteins.

1246 (e-h) OCR traces of WT versus KO HEK293T cells overexpressing WT TRAP1 (e),  
1247 the ATPase mutants E115A/R402A (f),  $\Delta$ STRAP (g) or D158N (h).

1248 (i) Quantitation of the basal respiration rates of WT versus KO HEK293T cells  
1249 expressing the indicated proteins.  
1250 (j) OCR traces with WT and KO MAFs and MAF KO cells exogenously expressing  
1251 either WT TRAP1 or the TRAP1 low ATPase mutant E115A.  
1252 All data are reported as means  $\pm$  SEM (n = 3) with asterisks indicating statistically  
1253 significant differences between compared groups (\*p<0.05, \*\*p<0.01, and  
1254 \*\*\*p<0.001).

1255

1256 **Figure 4. TRAP1 proteomics.**

1257 (a) Comparative relative abundance of proteins immunoprecipitated with the  
1258 indicated TRAP1 ATPase mutants. The scatter plot was constructed with an average  
1259 of normalized PSM values (TRAP1 itself was set to 100) to compare the  
1260 interactomes of TRAP1 mutants E115A/R402A with low ATPase activity (Y-axis) and  
1261 the hyperactive ATPase mutant  $\Delta$ Strap (X-axis); the bigger the distance from the  
1262 origin on either axis, the more binding there is. The dashed red arrow connects the  
1263 area near the origin of the plot to the zoomed out inset.

1264 (b) Relative quantitation of protein binding to the TRAP1 mutants E115A/R402A and  
1265  $\Delta$ Strap based on log<sub>2</sub> ratios of normalized PSM values. Proteins above the X axis  
1266 interact more with the mutant E115A/R402A than the mutant  $\Delta$ Strap.

1267 (c) Volcano plot showing up- or downregulated mitochondrial proteins in a  
1268 comparison of WT and TRAP1 KO UMUC3 cells. These data are based on the  
1269 SILAC analysis of the whole cell proteome filtered for mitochondrial proteins.

1270

1271

1272 **Figure 5. TRAP1 exists as a complex in mitochondria.**

1273 Immunoblot of a native protein gel (NATIVE PAGE) showing TRAP1 complexes in  
1274 mitochondrial extracts of WT versus KO HEK293T cells, and KO cells  
1275 overexpressing WT TRAP1 or the TRAP1 mutants E115A/R402A or  $\Delta$ Strap. Note  
1276 that the  $\Delta$ Strap mutant forms a slightly larger complex when compared to the others.  
1277 The immunoblot was probed with a TRAP1 antibody. A parallel immunoblot was  
1278 performed on the same samples under denaturing conditions (10% SDS PAGE) to  
1279 check the expression levels of TRAP1. HSP60 and mtHSP70 were used as positive  
1280 and GAPDH as negative controls to check the quality of the mitochondrial extracts.

1281

1282 **Figure 6. The TRAP1 complex is induced by OXPHOS inhibition.**

1283 (a) Immunoblot of a native gel analysis of TRAP1 complexes from HEK293T cells  
1284 grown with different carbon sources under normoxia or hypoxia (1% O<sub>2</sub>) overnight.  
1285 Lower panel: graphical representation of the levels of the TRAP1 complex shown in  
1286 the upper panels; band intensities were quantitated using ImageJ.  
1287 (b) Immunoblot of a native gel analysis of TRAP1 complexes from cells subjected to  
1288 hypoxia (1% O<sub>2</sub>) or an oligomycin (10  $\mu$ M) treatment in parallel (in normoxia) for 2, 4,  
1289 6 and 8 hrs. The lower panel shows the quantitation.  
1290 (c) Immunoblot of a native gel analysis to compare the complexes formed by  
1291 endogenous TRAP1 and the indicated overexpressed tagged versions of TRAP1.  
1292 For comparison, the endogenous TRAP1 complex was induced with oligomycin (10  
1293  $\mu$ M). Note that no TRAP1 dimer is detectable at steady state under any condition. All  
1294 native gel immunoblots were probed with a TRAP1 antibody and a parallel  
1295 immunoblot under denaturing conditions (7.5% SDS PAGE) was also performed to  
1296 check TRAP1 levels. HSP60 and GAPDH served as positive and negative controls

1297 to check the quality of the mitochondrial extracts. All quantitations with ImageJ  
1298 shown are for a single native gel; similar results were obtained in 3 independent  
1299 experiments.

1300

1301 **Figure 7. TRAP1 complexes with inhibition and induction of OXPHOS.**

1302 (a) Immunoblot of a native gel analysis of TRAP1 complexes from MCF-7 cells upon  
1303 inhibition of OXPHOS at different steps. The lower panel shows the quantitation.

1304 (b) Immunoblot of a native gel analysis of TRAP1 complexes from HEK293T cells  
1305 upon inhibition of OXPHOS at different steps alone and in combination.

1306 (c) ECAR profiles of HEK293T cells treated with OXPHOS inhibitors (ORA, cocktail  
1307 of oligomycin, rotenone and antimycin) with or without an LDH inhibitor (LDHi, 5  $\mu$ M).

1308 (d) OCR profile of HEK293T cells treated with OXPHOS inhibitors (ORA, cocktail of  
1309 oligomycin, rotenone and antimycin) with or without an LDH inhibitor (LDHi, 5  $\mu$ M).

1310 (e) Immunoblot of a native gel analysis of TRAP1 complexes from HEK293T cells  
1311 treated with LDHi for 2, 4 and 6 hrs.

# Figure 1

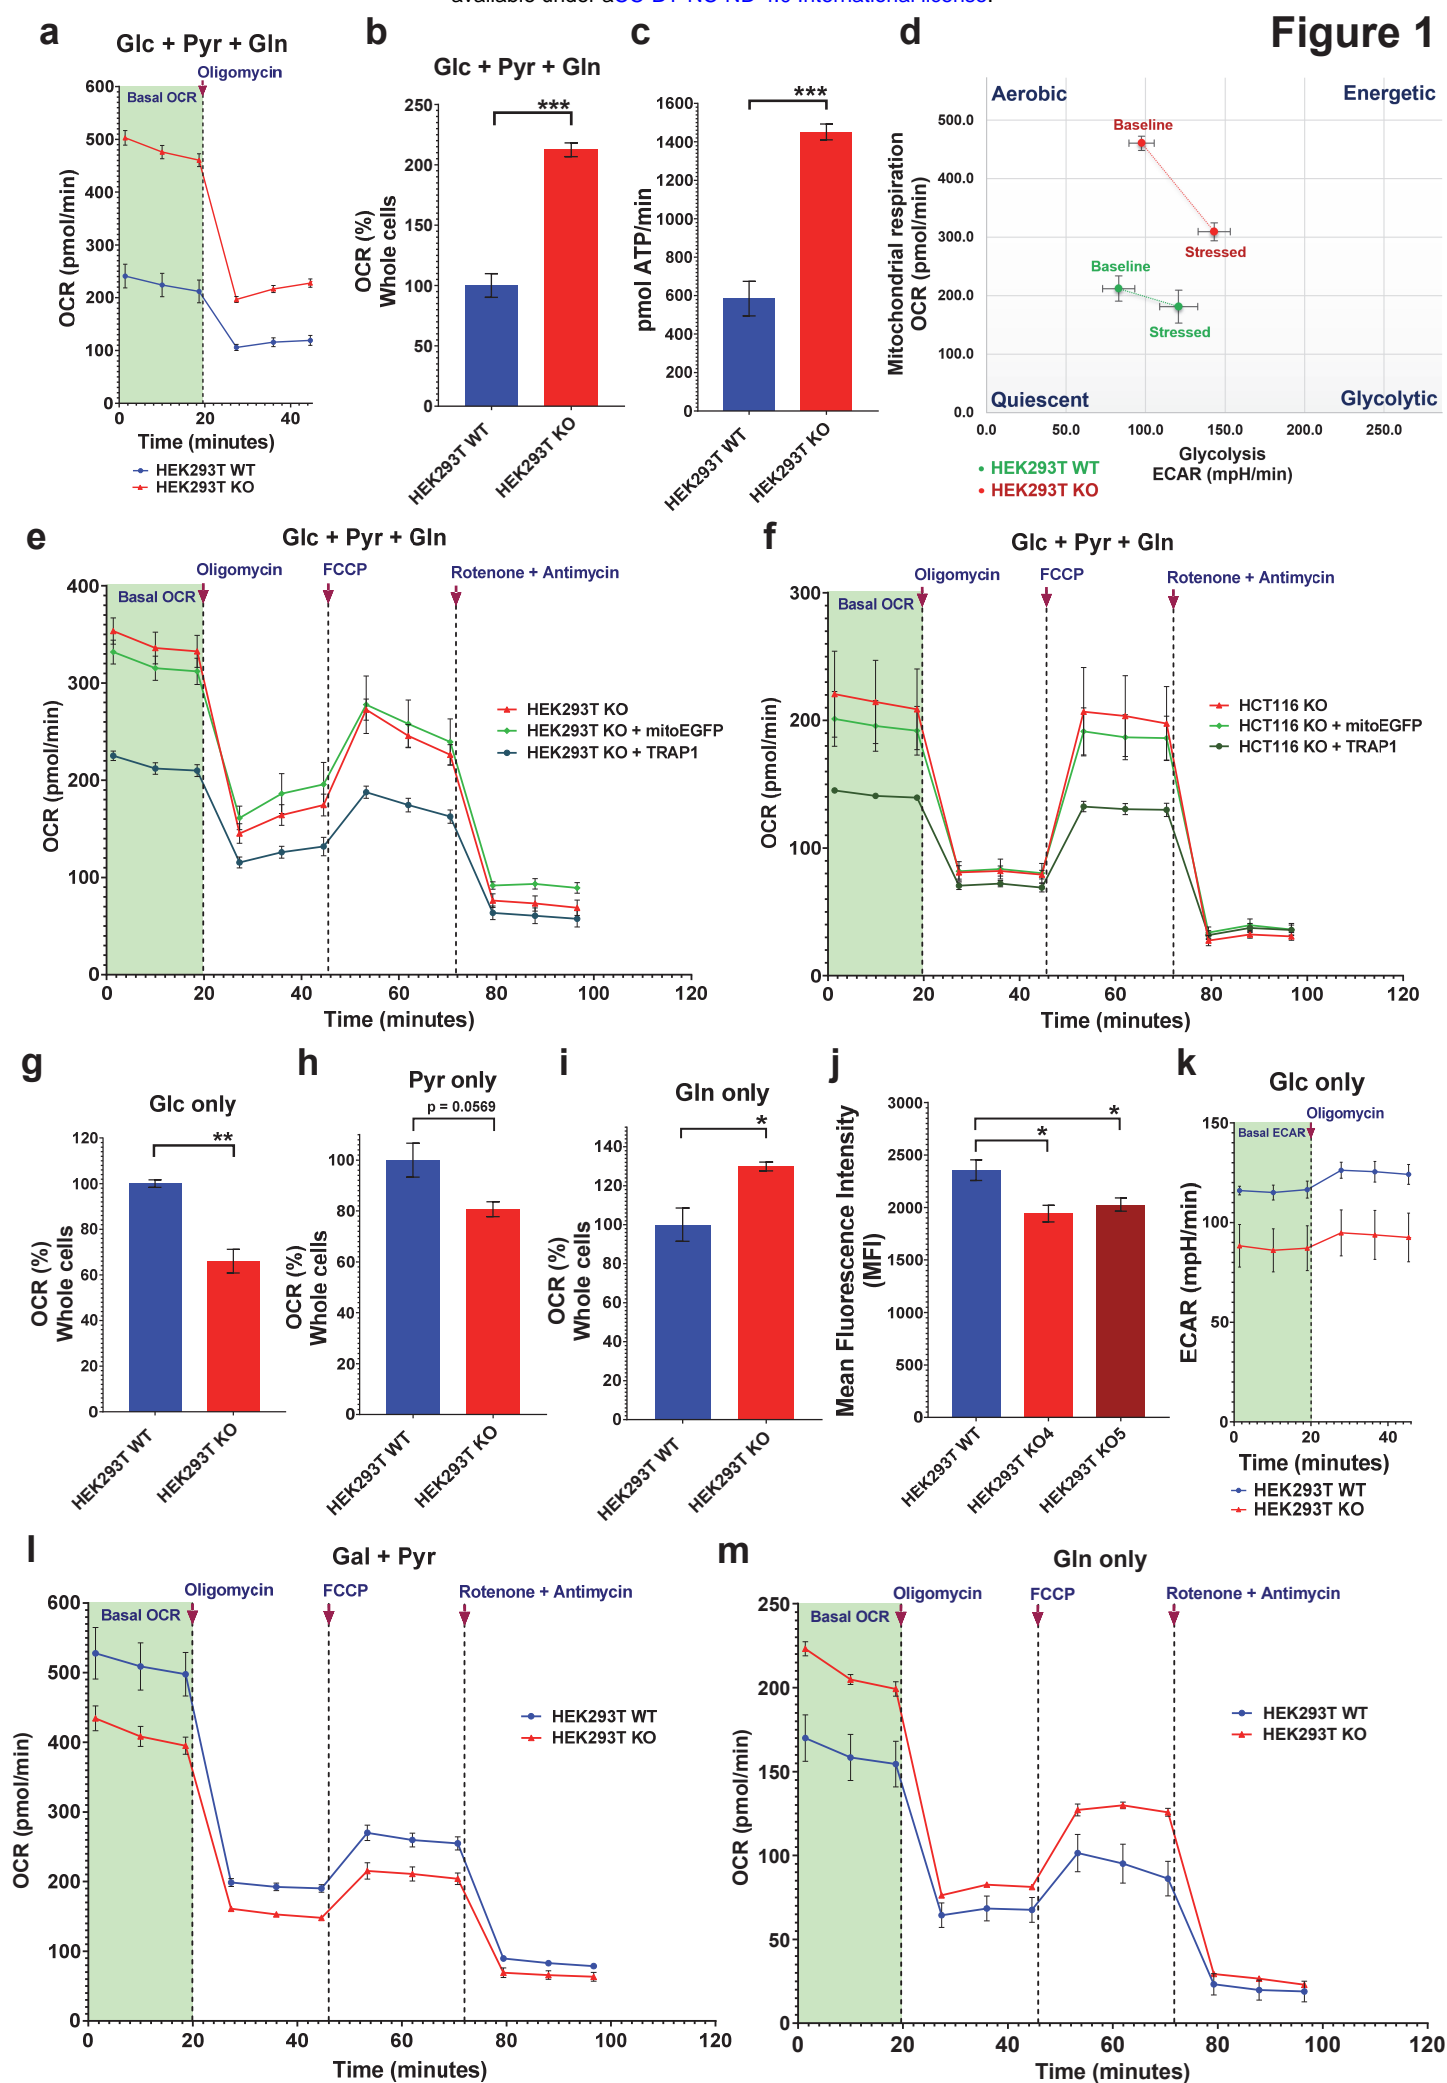

Figure 2

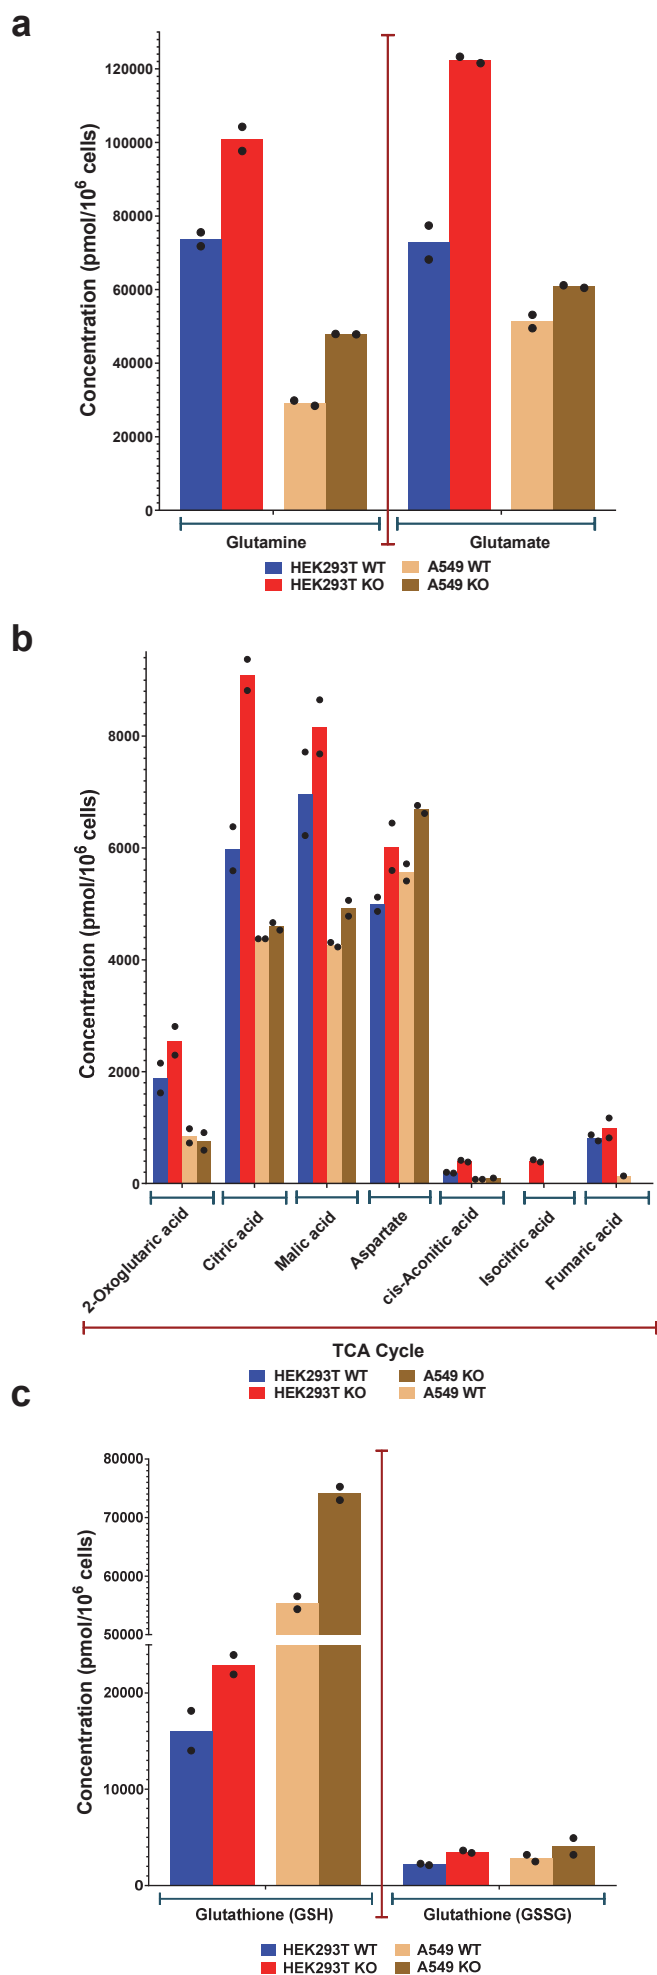



## Figure 3

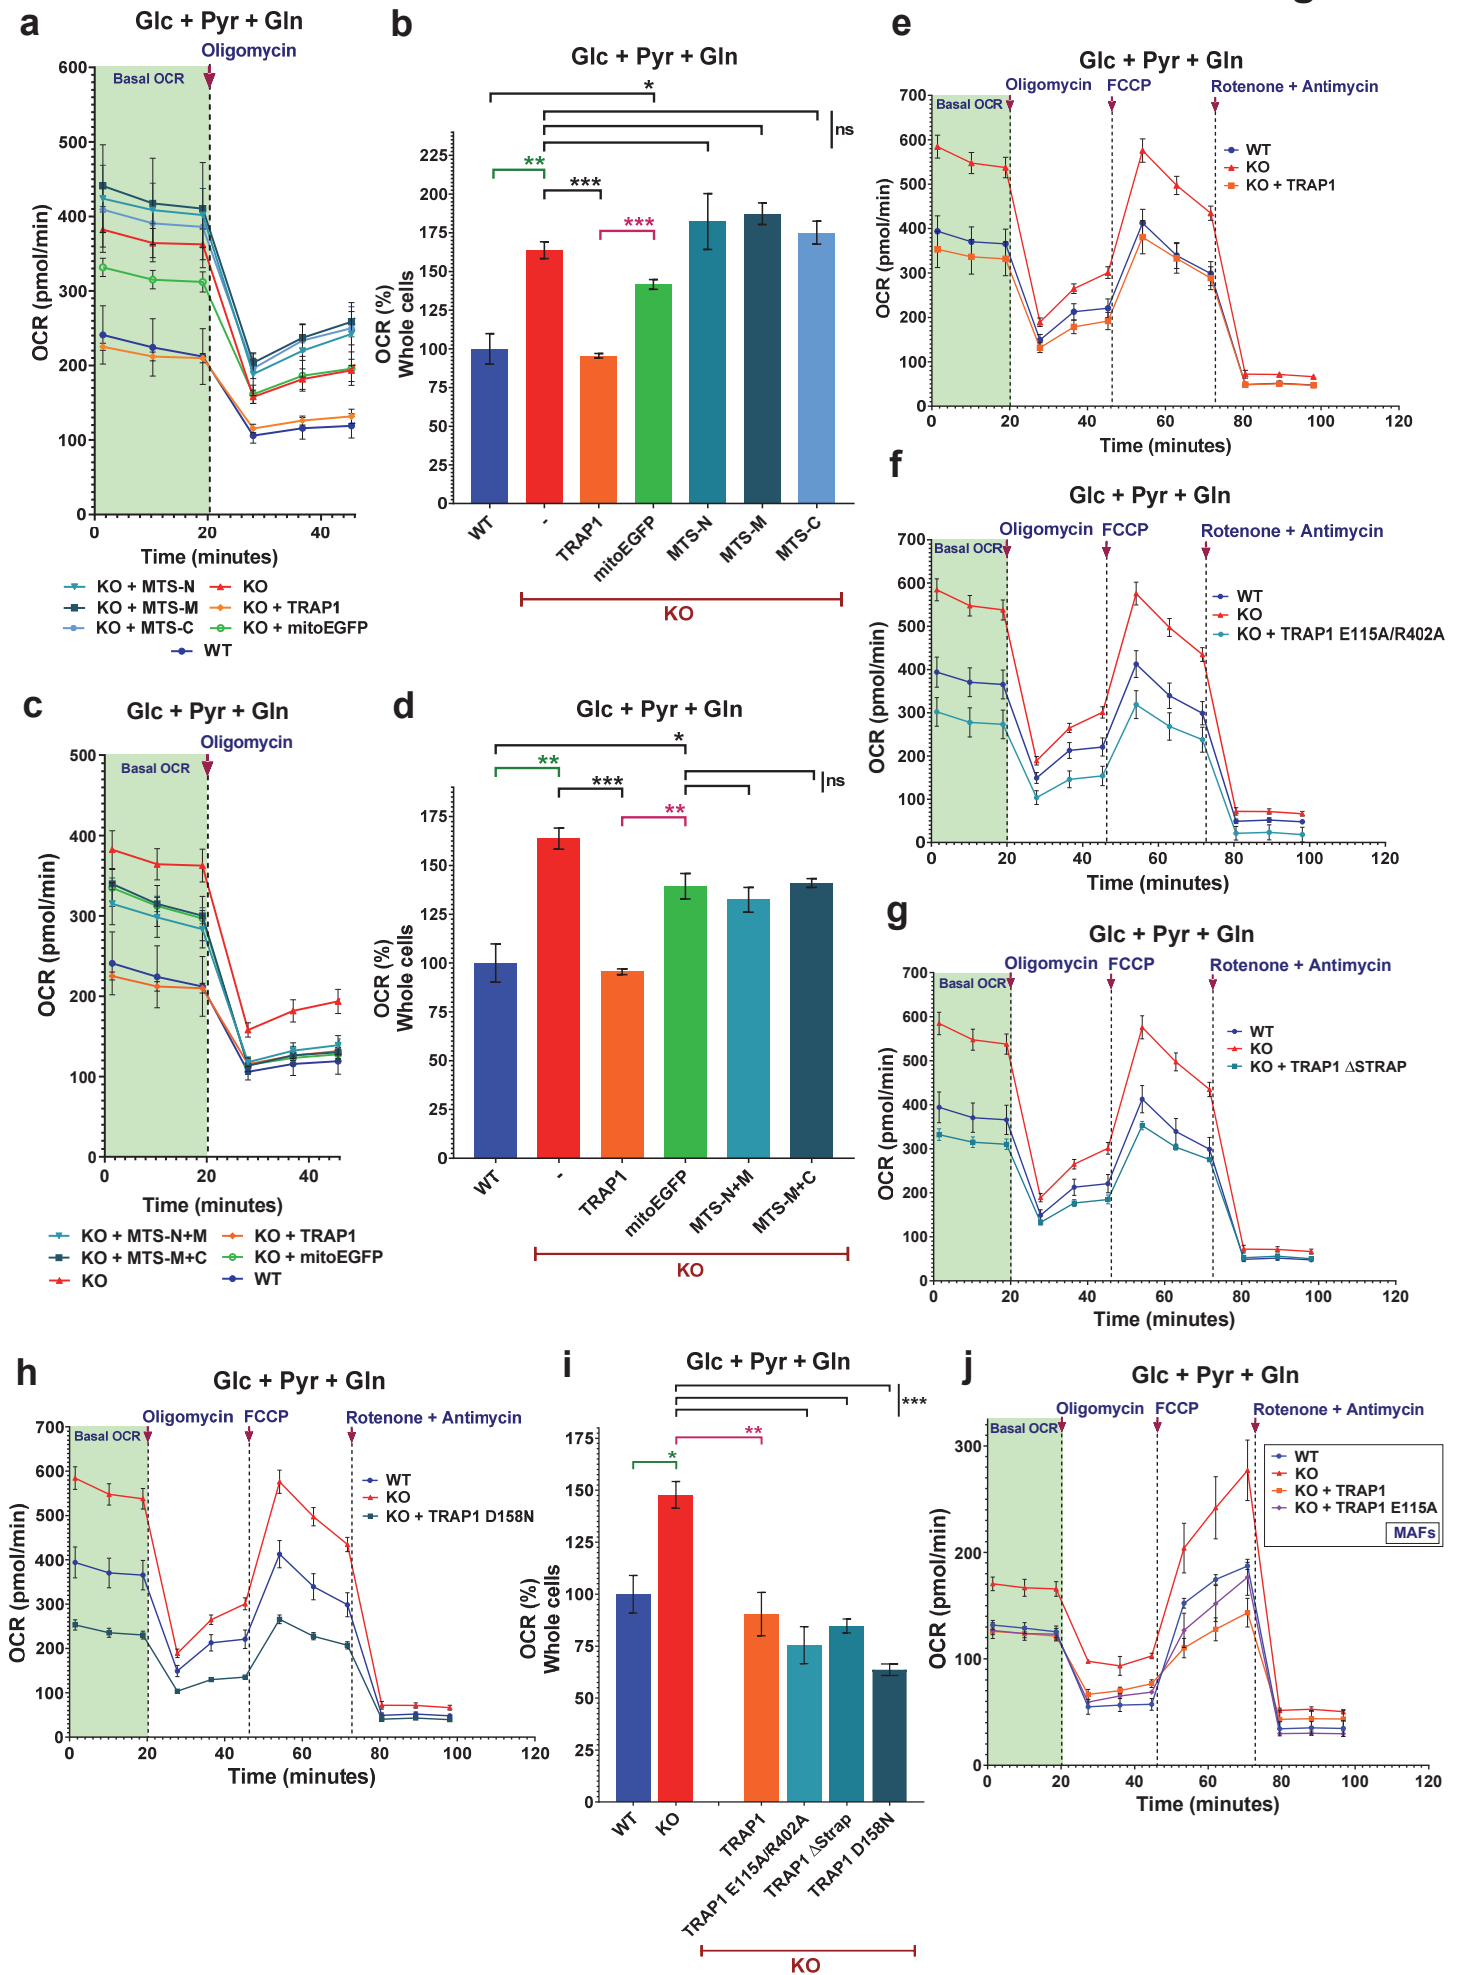

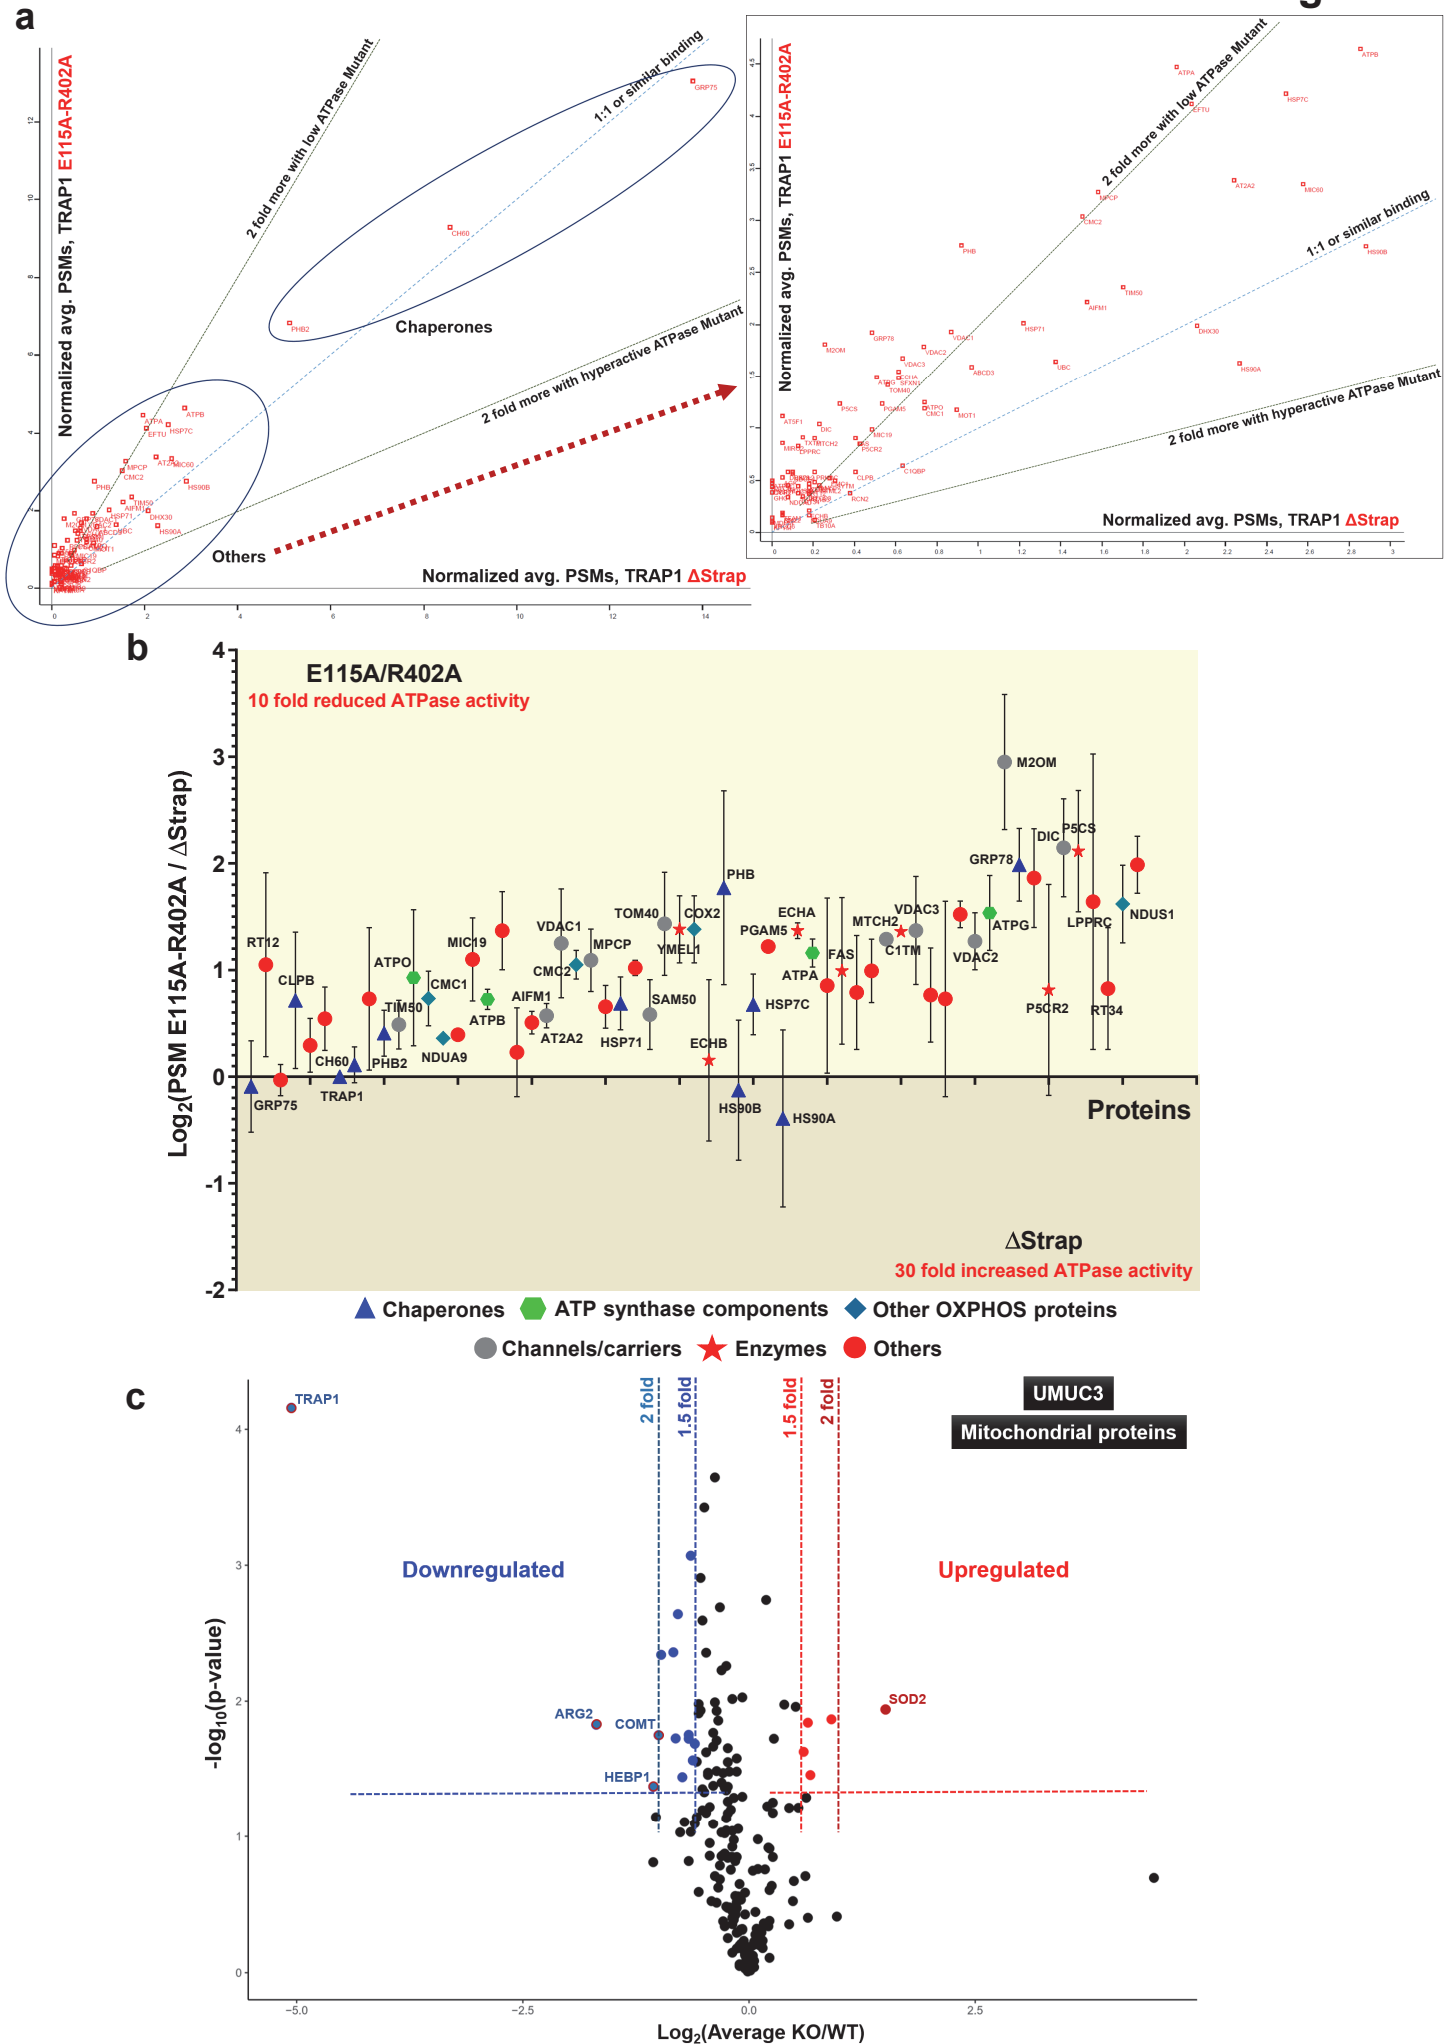

## Figure 5

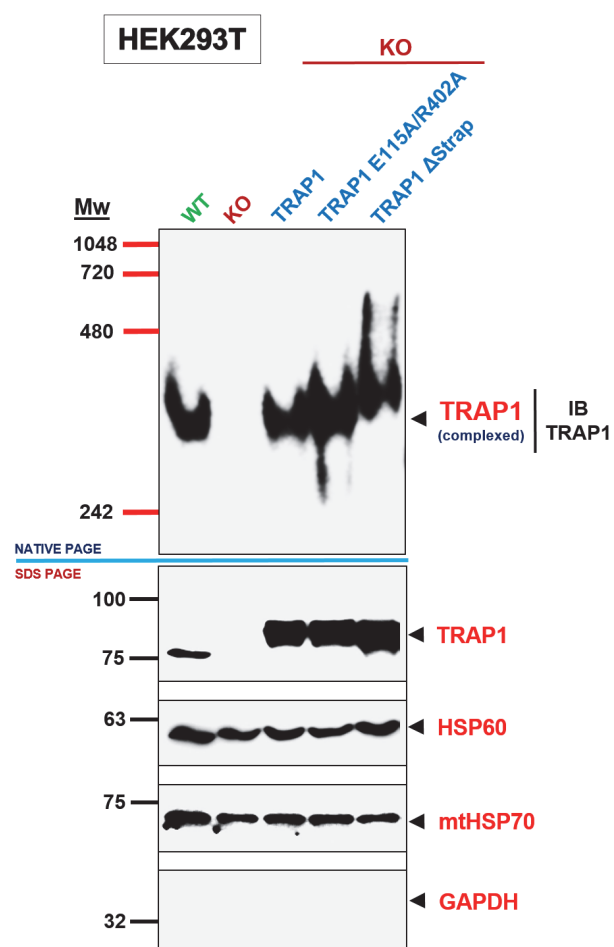

## Figure 6

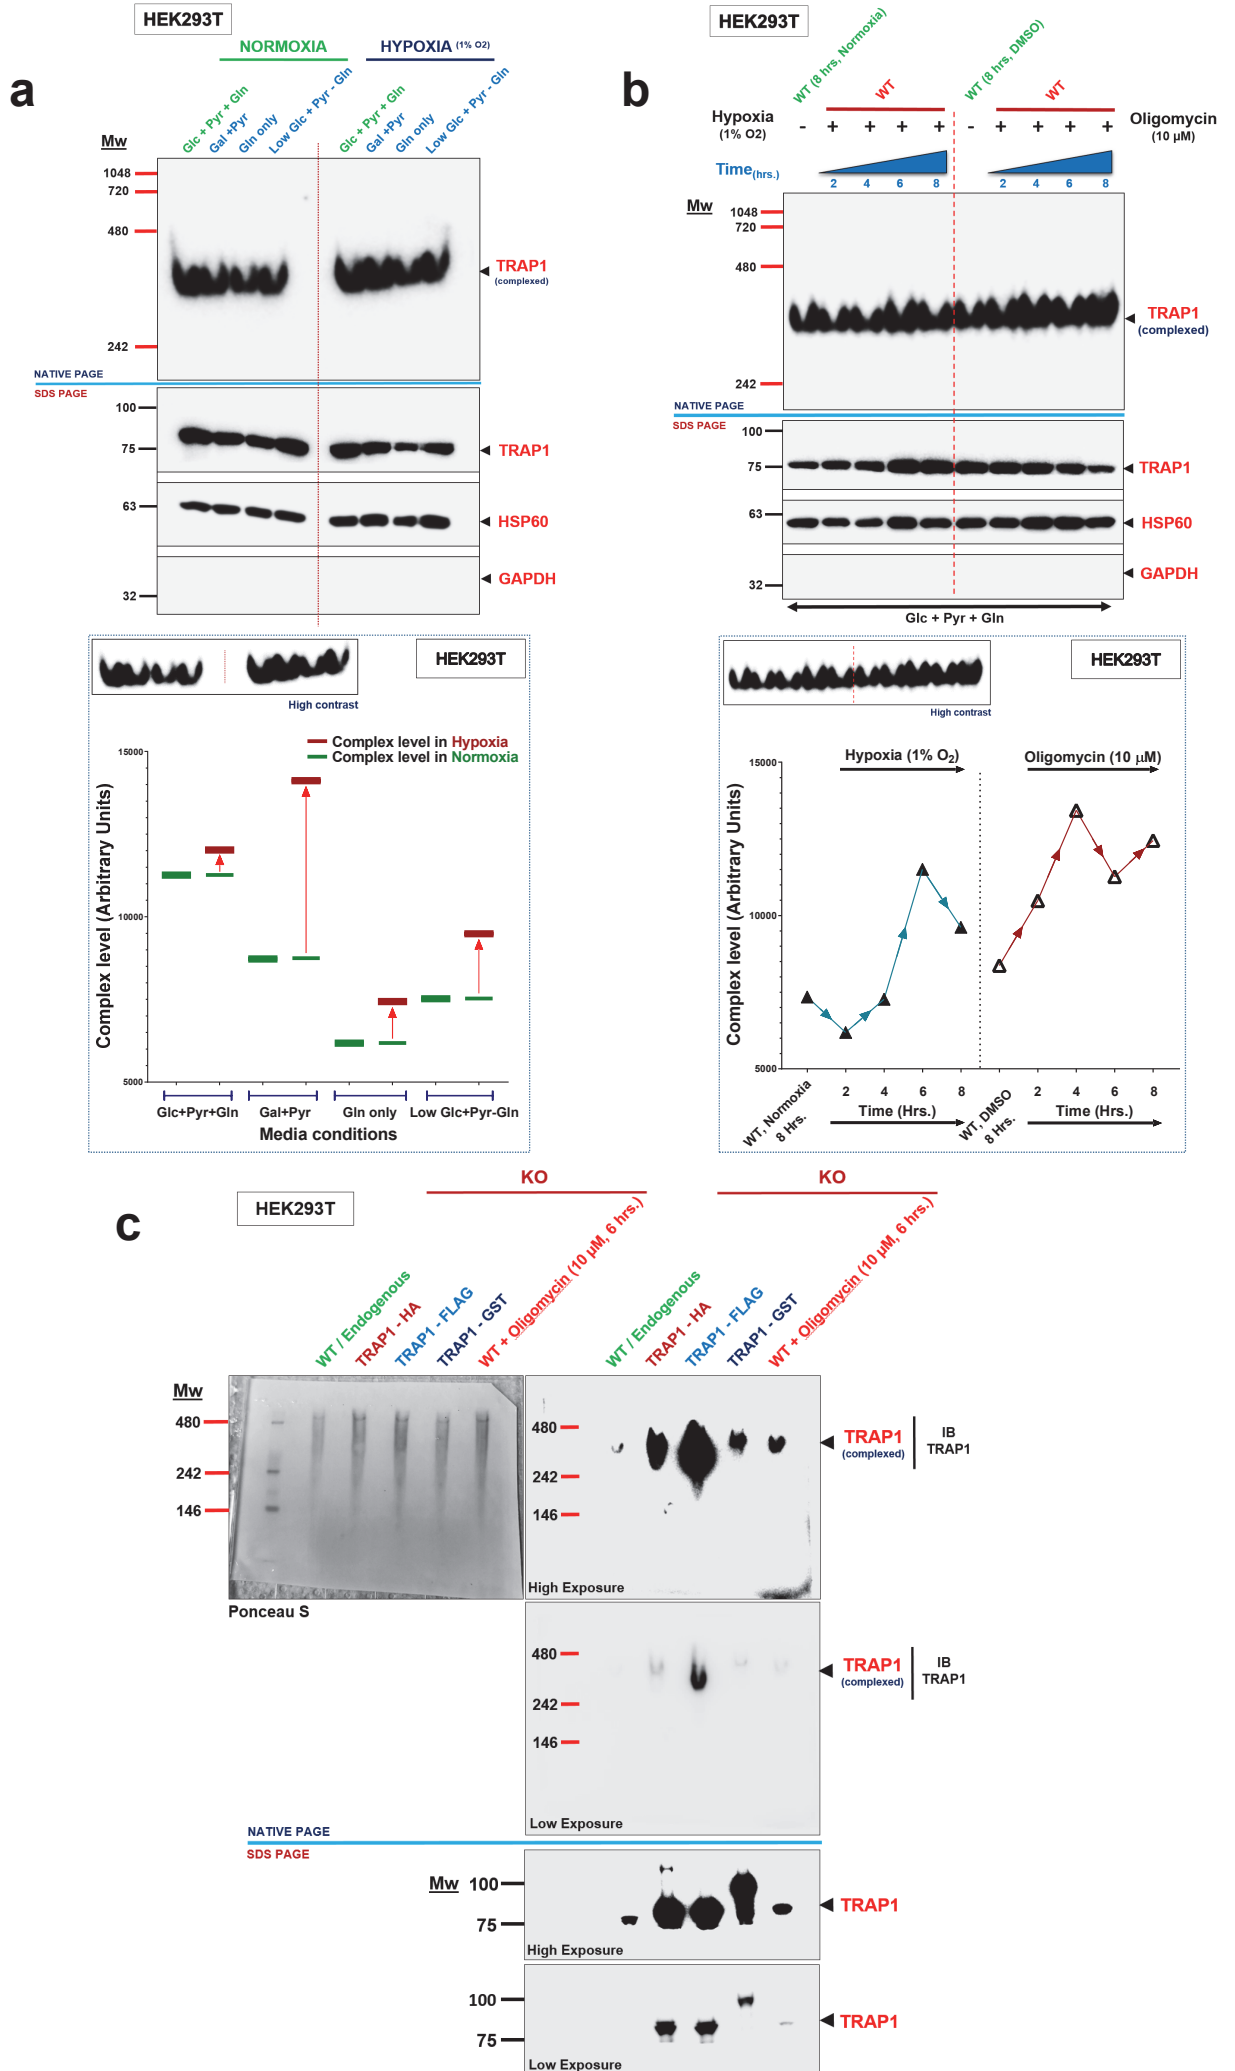

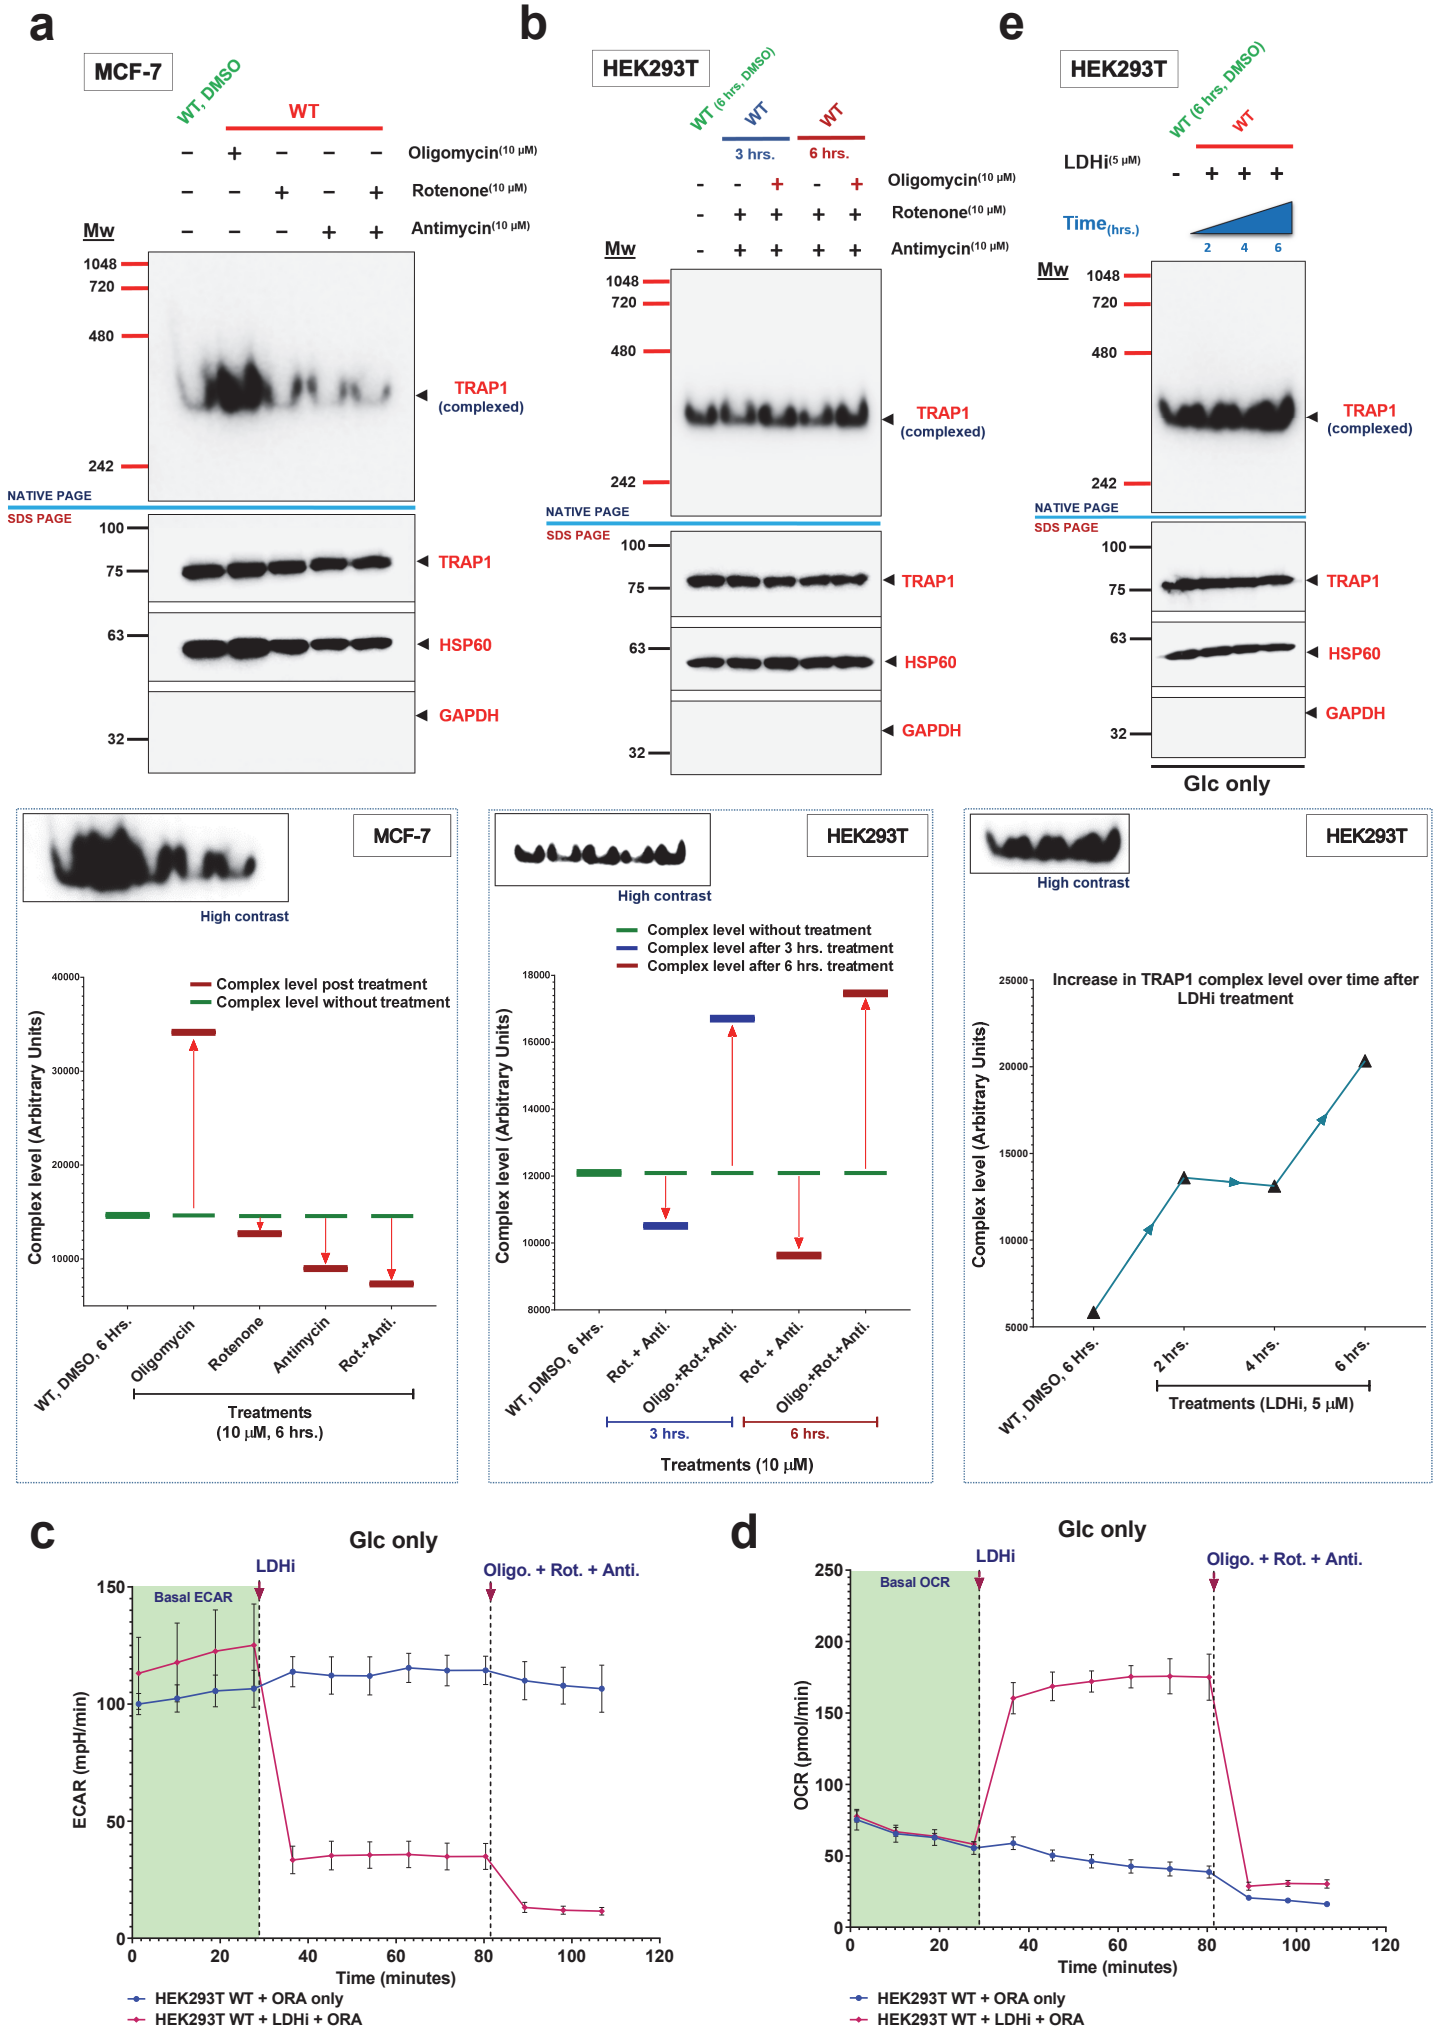

**a**

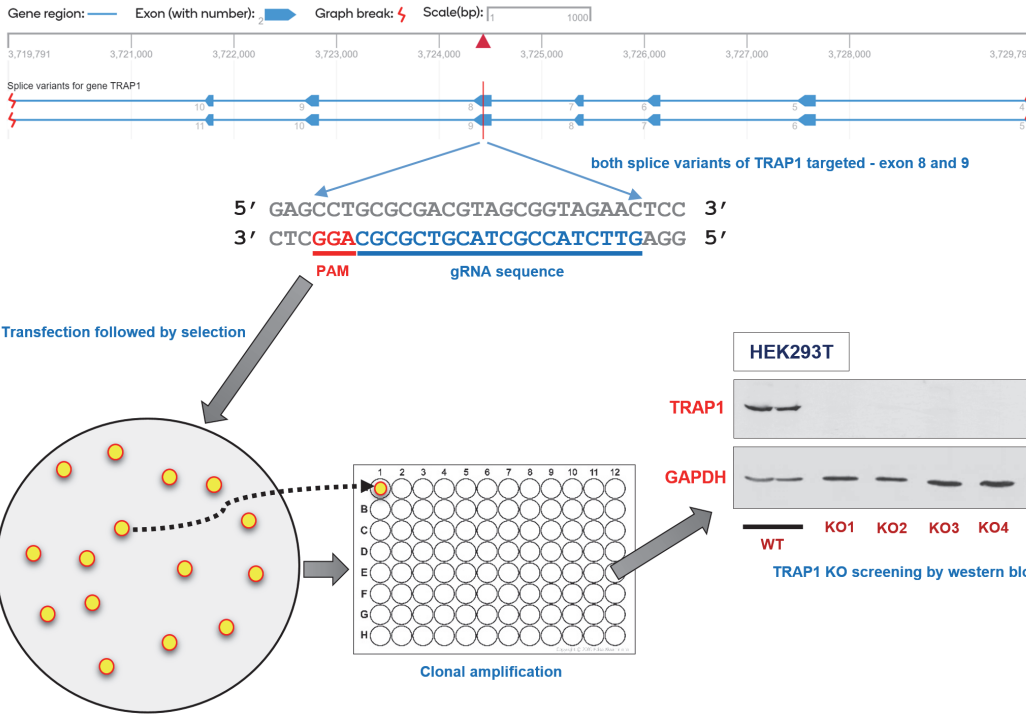

**b**

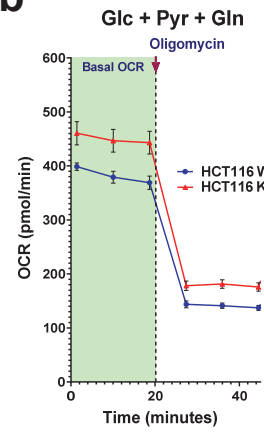

**c**

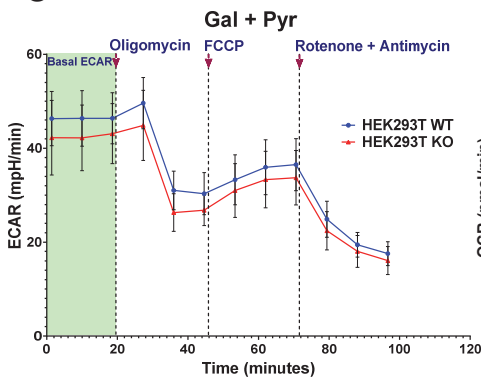

**d**

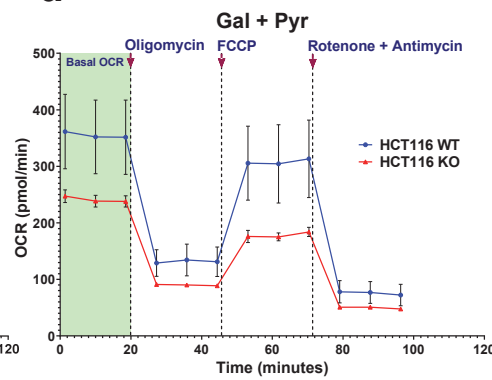

**e**

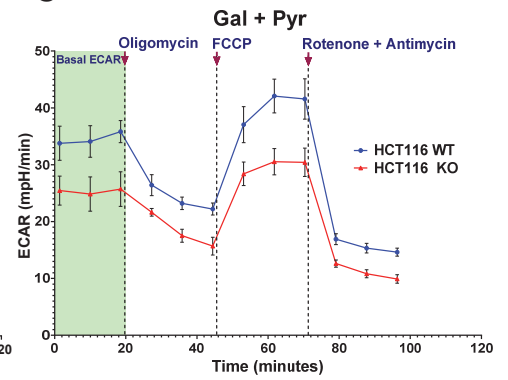

**f**

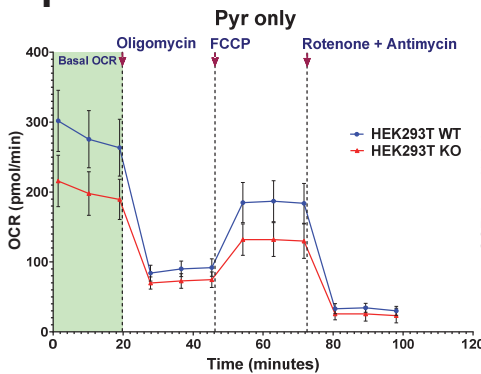

**g**

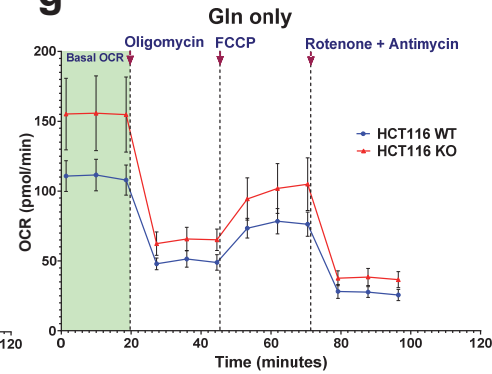

**h**

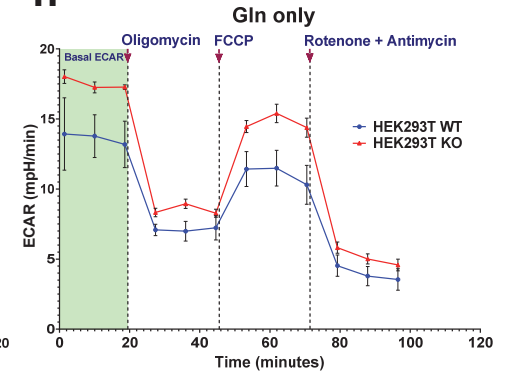

**i**

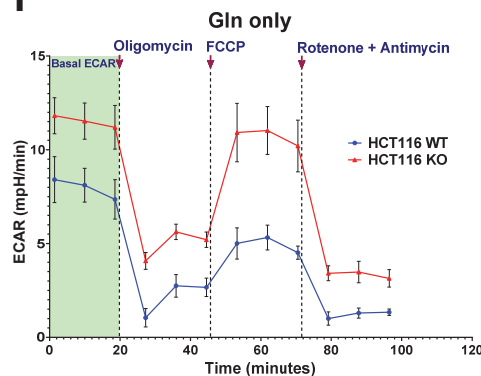

Carbon flow from  $^{13}\text{C}$  Gln into the TCA cycle

Figure S2

a

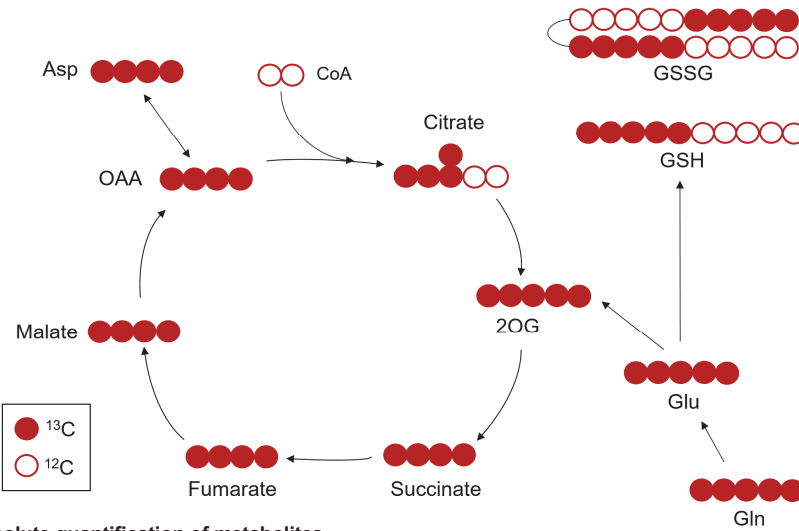

b

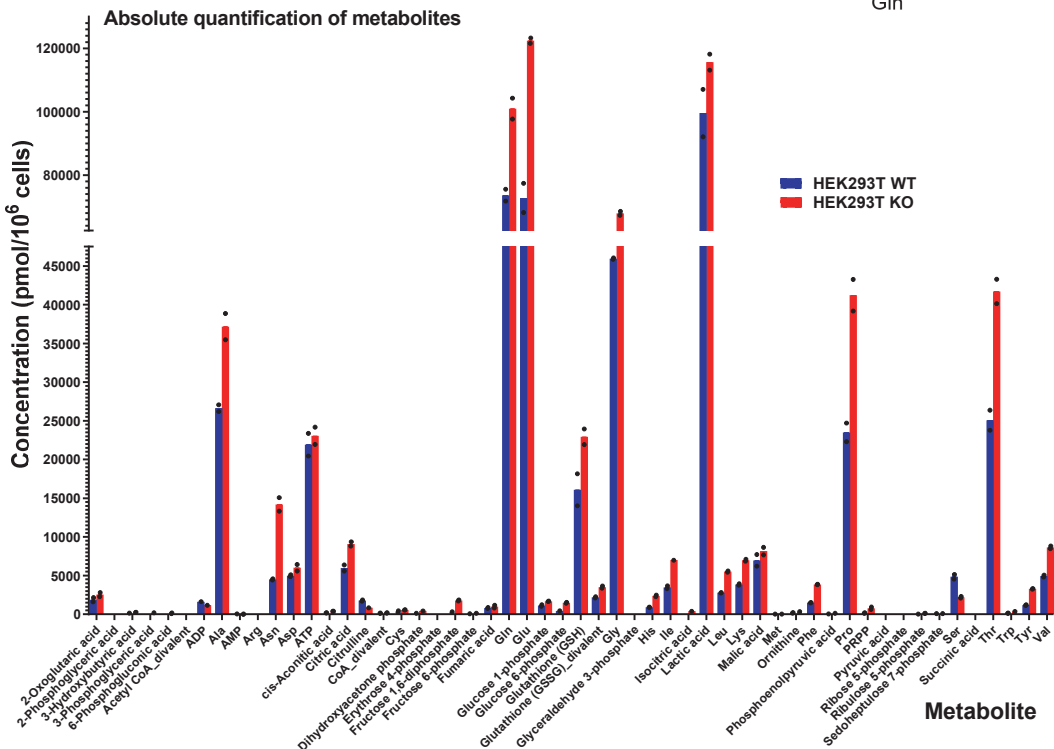

c

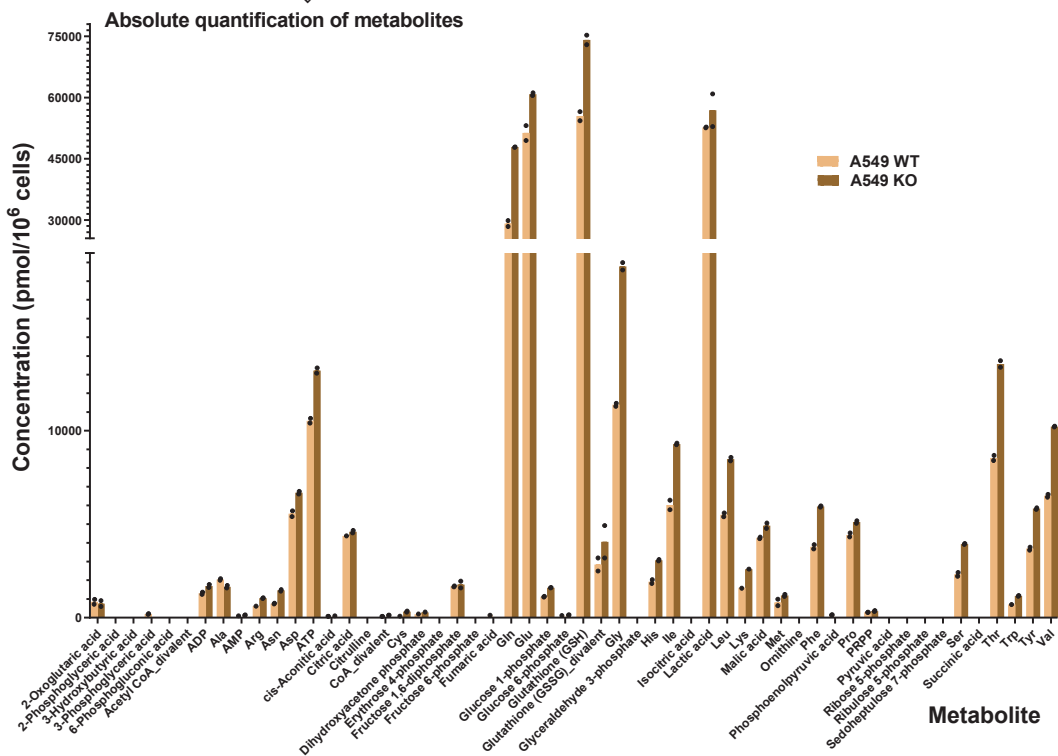

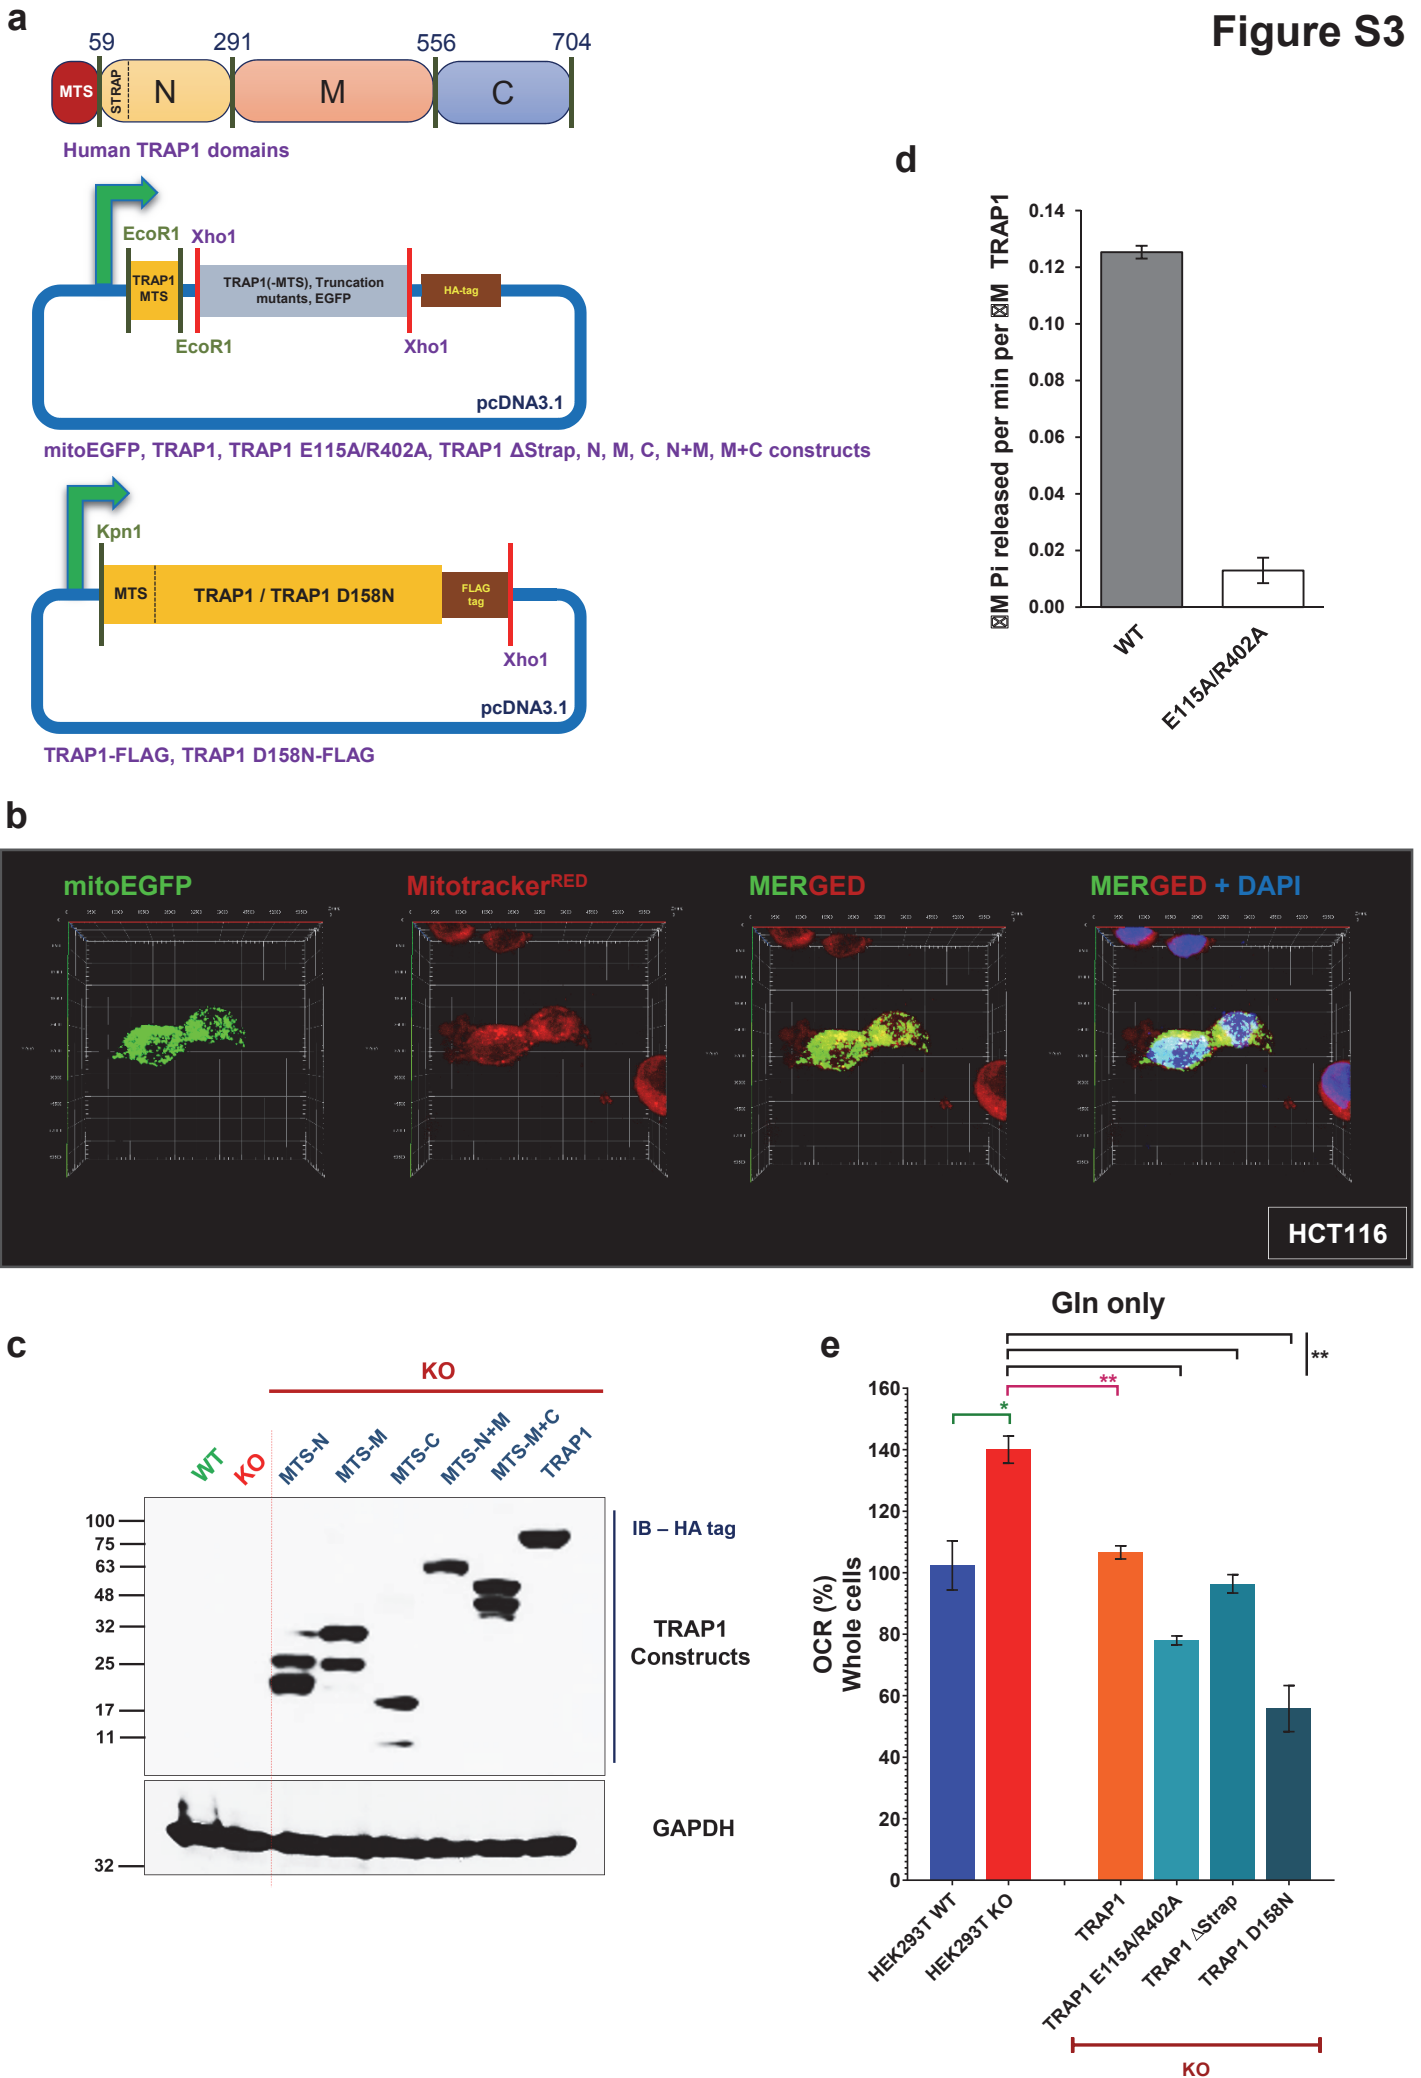



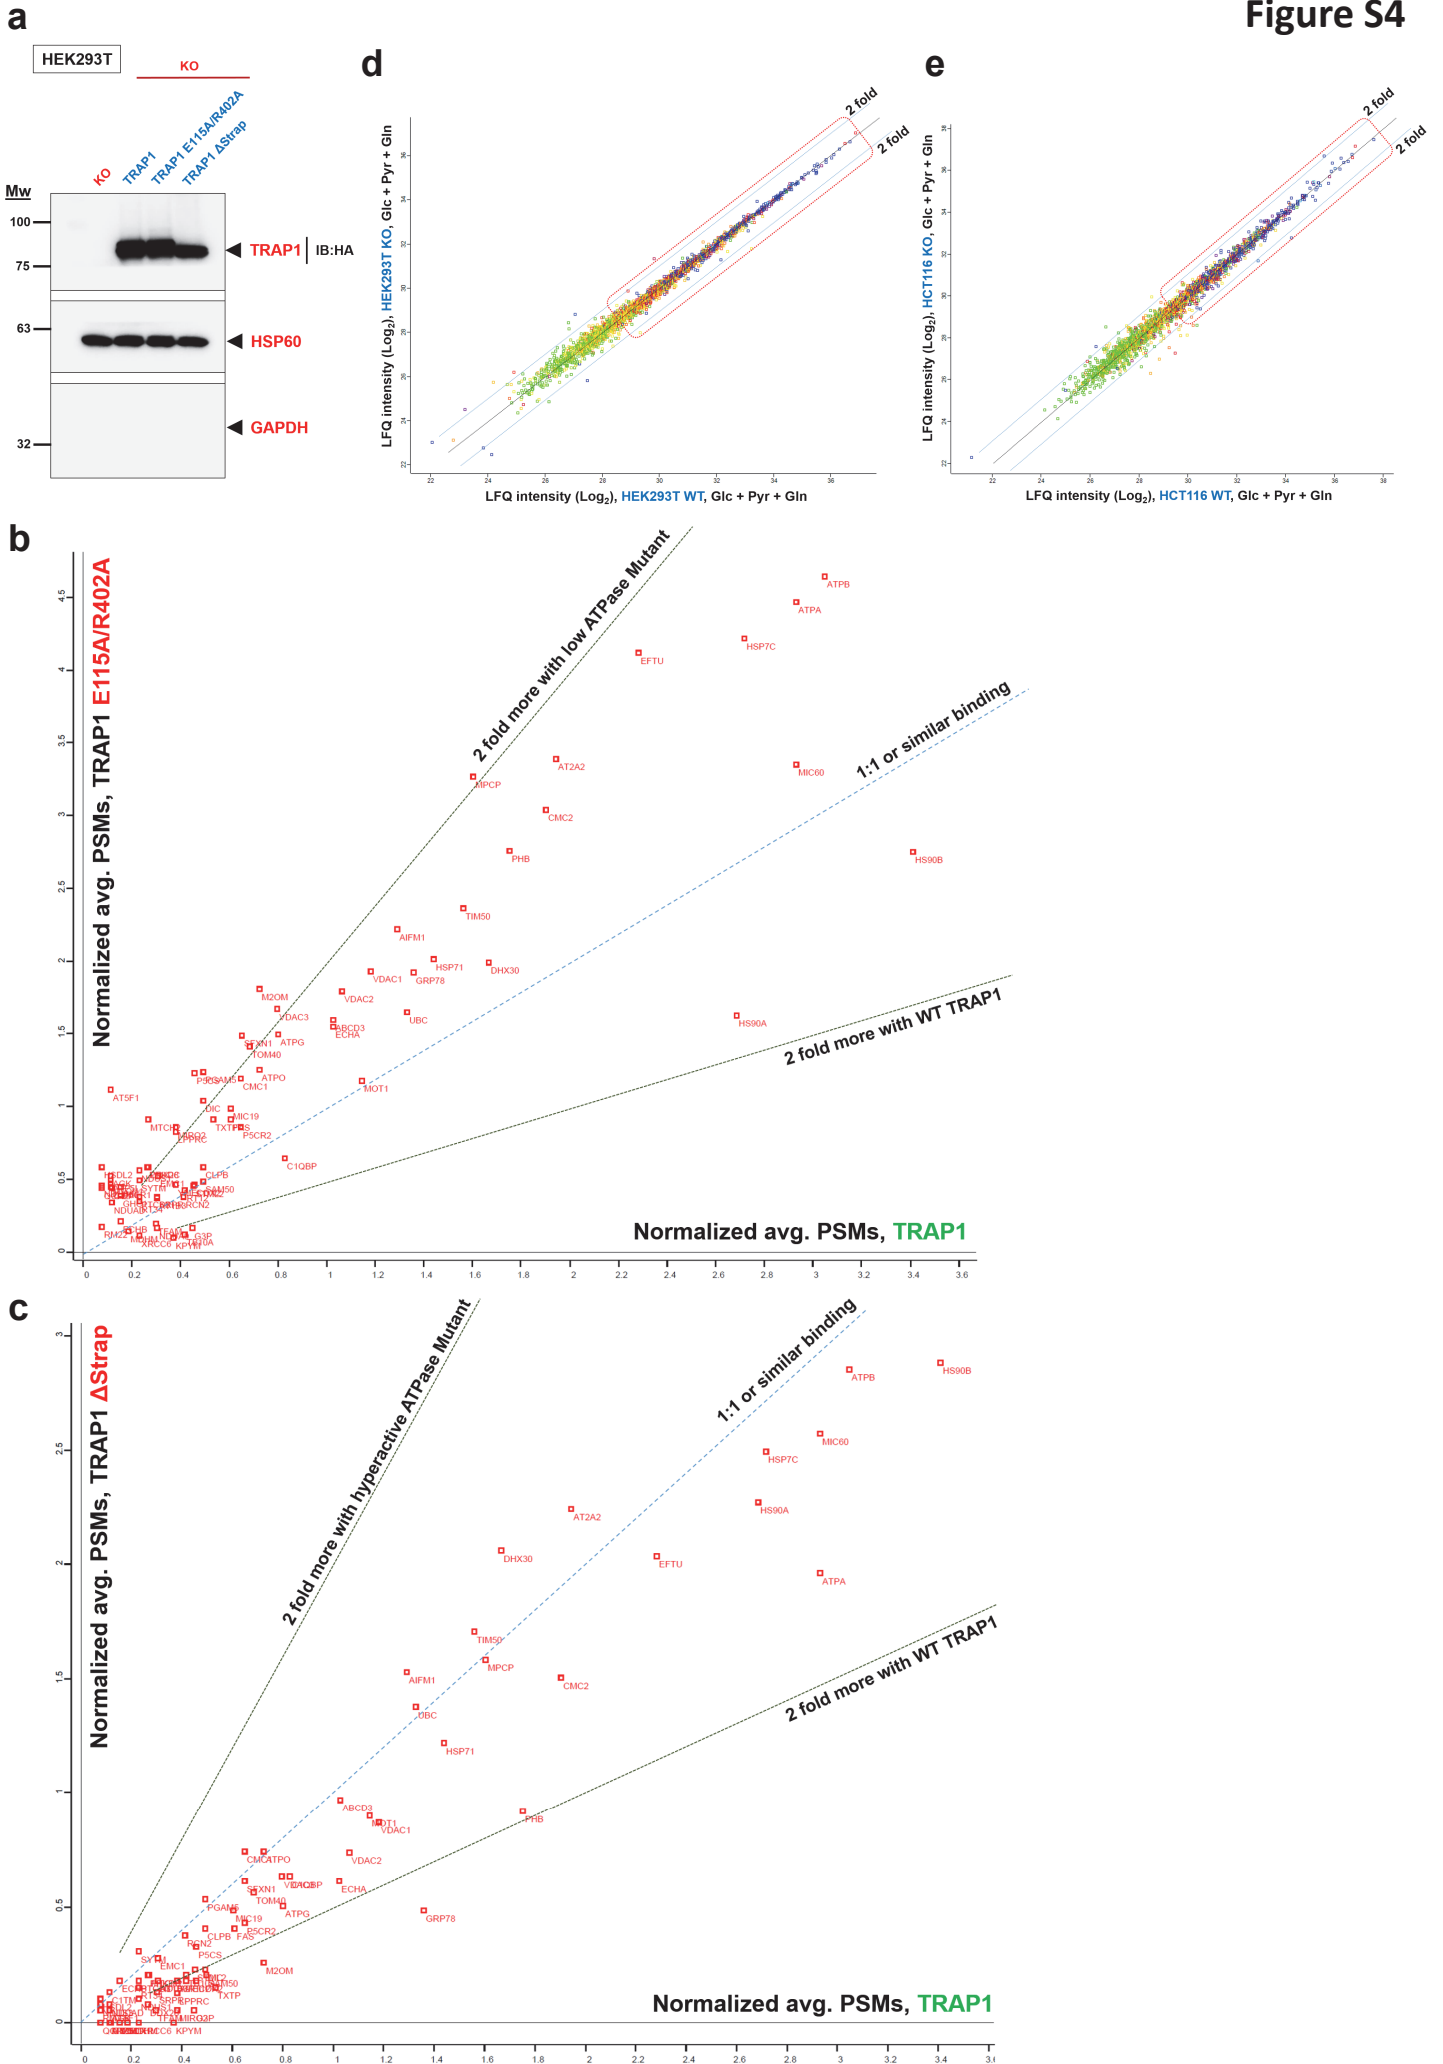

## Figure S5

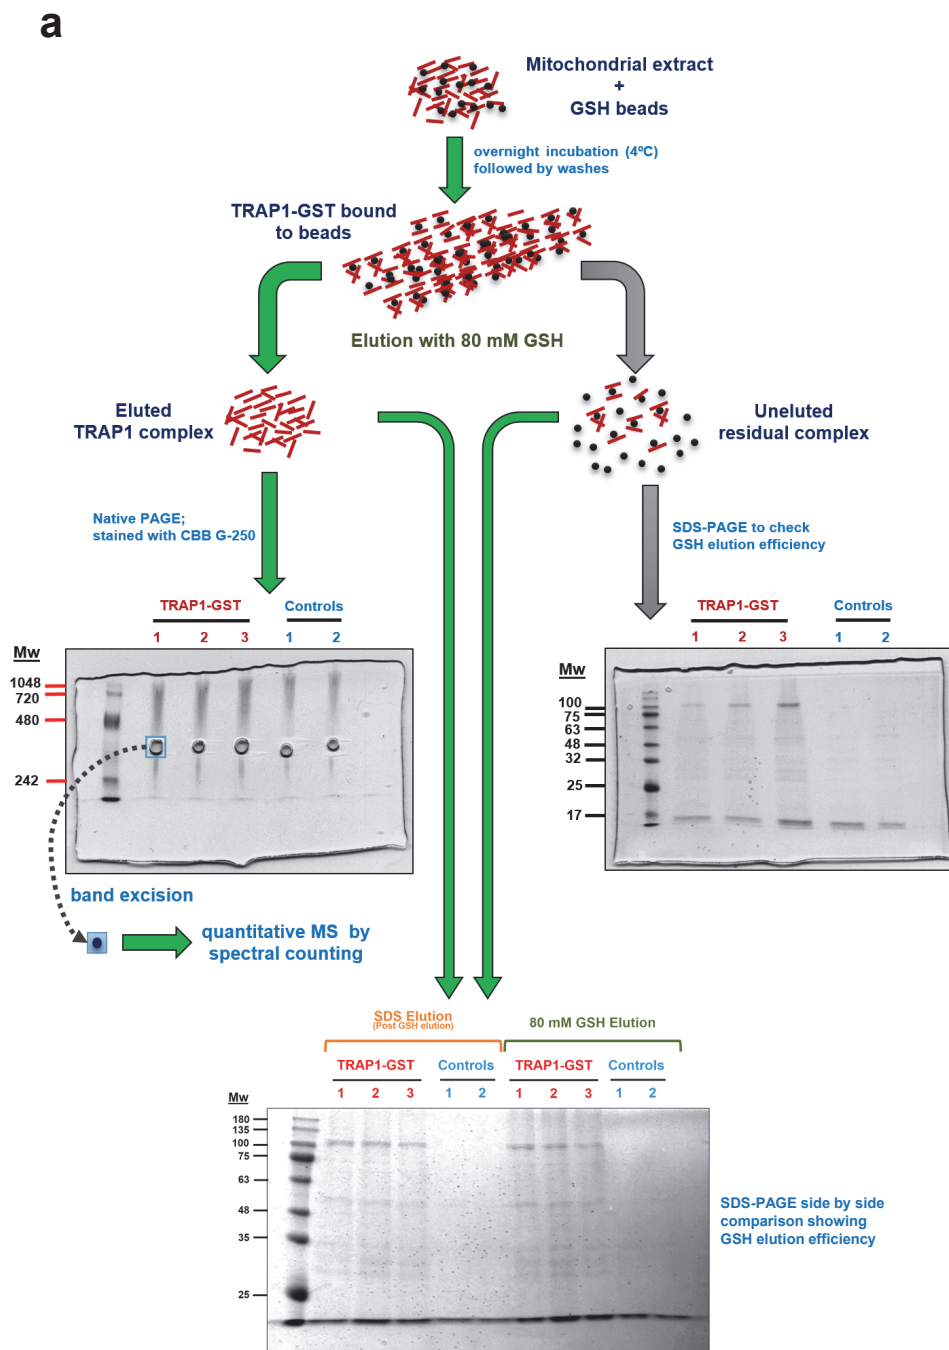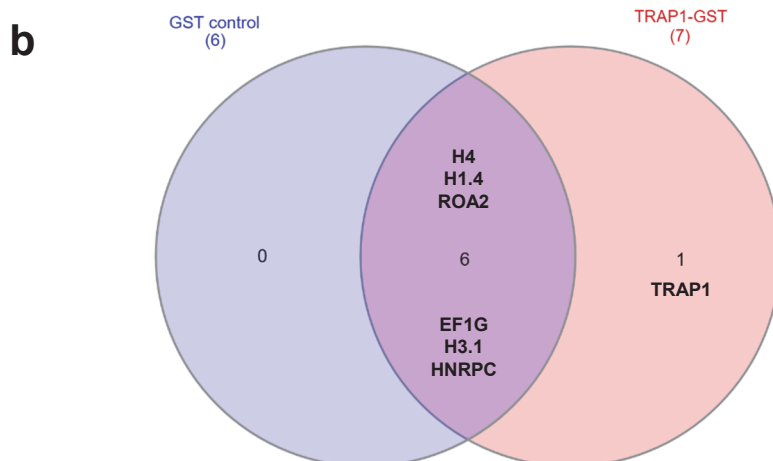

## Figure S6

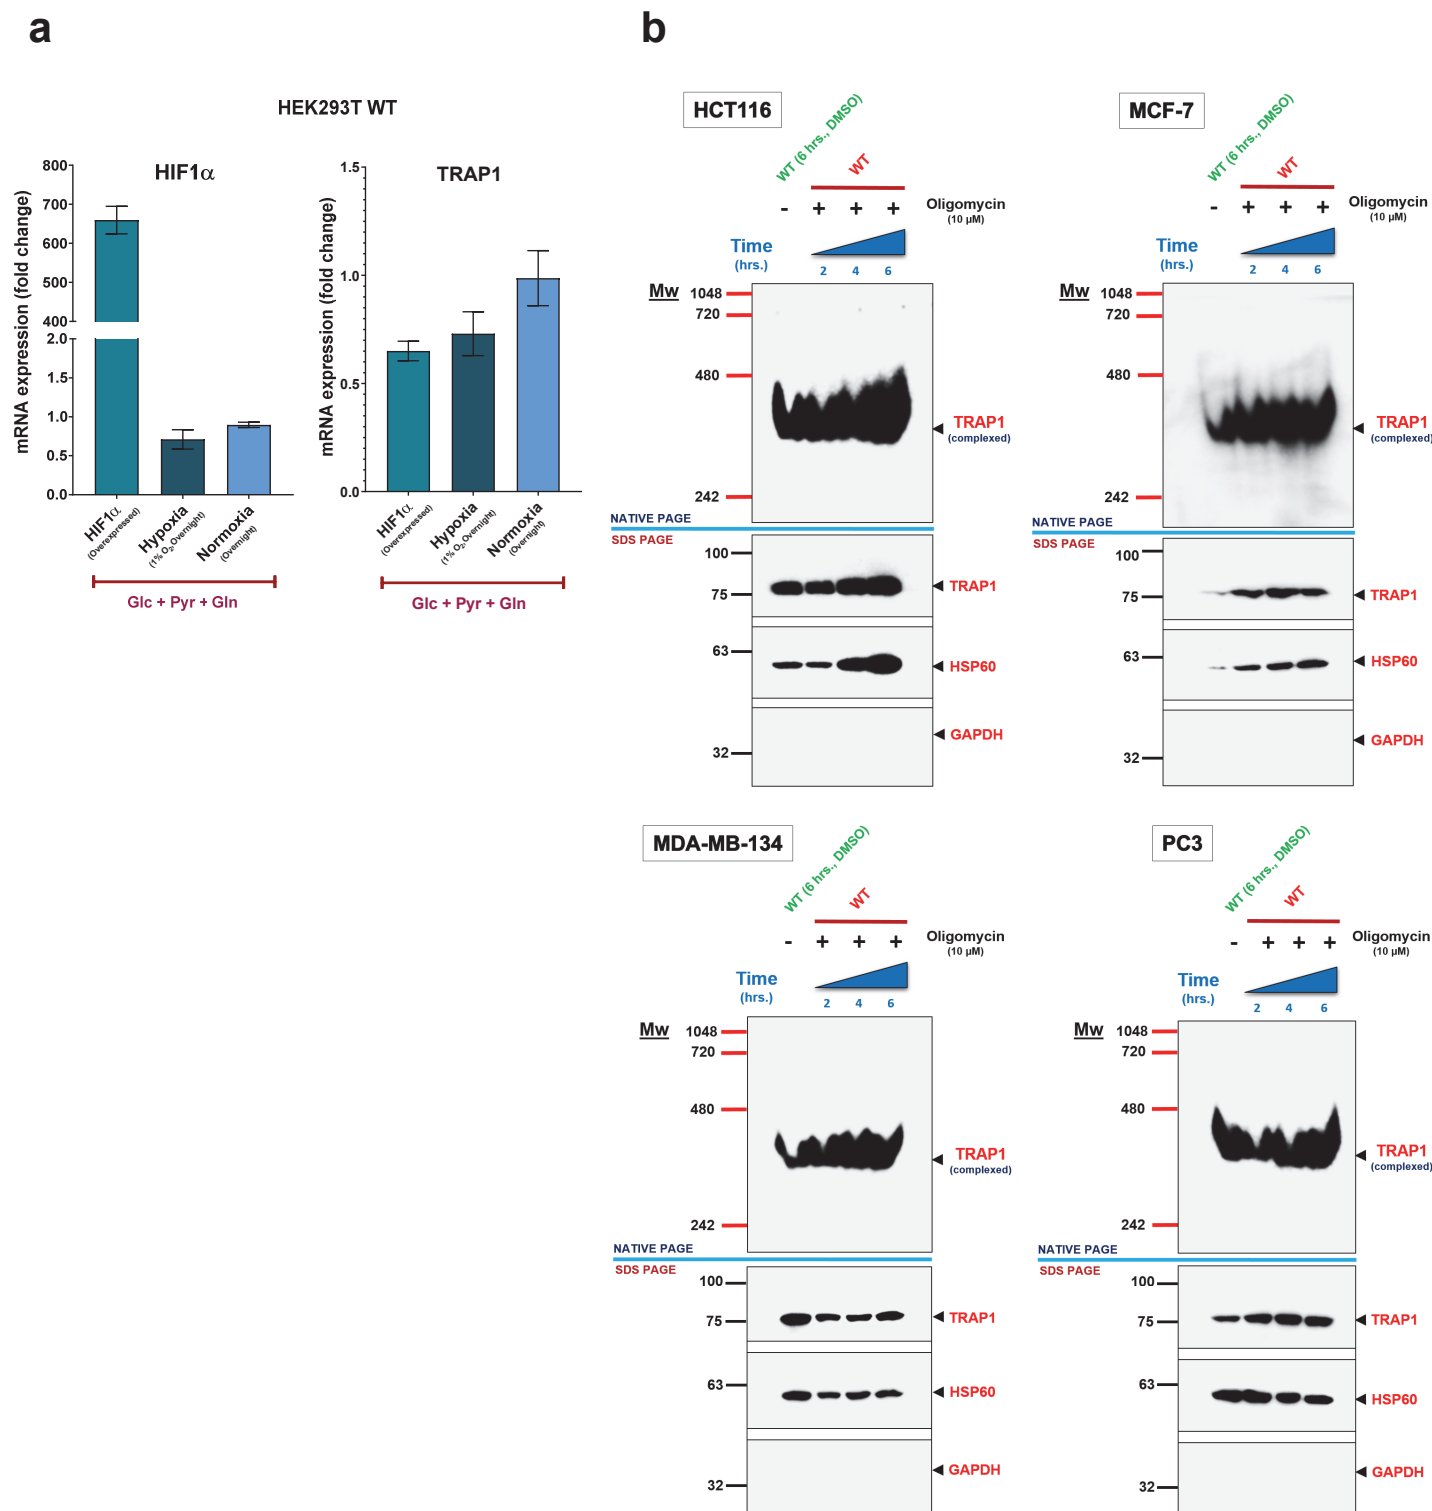

## Figure S7

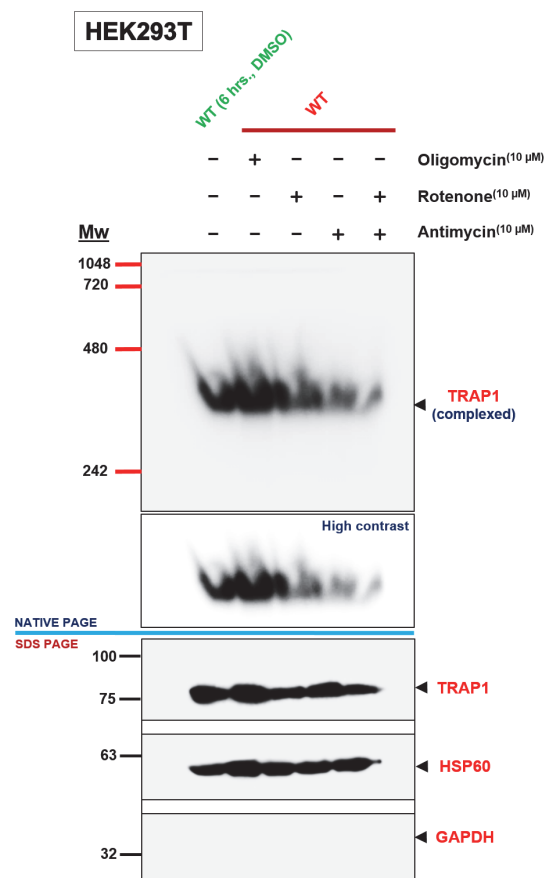

Source: https://www.biorxiv.org/content/biorxiv/early/2019/06/21/679431.full.pdf
